# Supplementary material for: Total synthesis of endiandric acid J and beilcyclone A from cyclooctatetraene
Source: Royal Society of Chemistry journal article supplement (doi:10.1039/d0sc03073b), 2020-01-01
Supplement: d0sc03073b1.pdf [file d0sc03073b1.pdf]

*Electronic Supplementary Information*

**Total Synthesis of Endiandric Acid J and Beilcyclone A from  
Cyclooctatetraene**

Oussama Yahiaoui, Adrian Almass and Thomas Fallon

Department of Chemistry, The University of Adelaide, SA 5005 (Australia)

E-mail: [thomas.fallon@adelaide.edu.au](mailto:thomas.fallon@adelaide.edu.au)

Table of Contents

|                                                                                                       |           |
|-------------------------------------------------------------------------------------------------------|-----------|
| <b>General Procedures</b>                                                                             | <b>2</b>  |
| <b>Experimental Procedures</b>                                                                        | <b>3</b>  |
| <b>Synthesis of (2Z,4Z,7Z)-6-decylcycloocta-2,4,7-trien-1-ol (4)</b>                                  | <b>3</b>  |
| <b>Synthesis of (1Z,3Z,6Z)-5-decyl-8-(vinylloxy)cycloocta-1,3,6-triene (5)</b>                        | <b>3</b>  |
| <b>Synthesis of 2-((1S,6R)-8-decylbicyclo[4.2.0]octa-2,4-dien-7-yl)acetaldehyde (6a, 6b)</b>          | <b>4</b>  |
| <b>Synthesis of Endiandric acid J (1)</b>                                                             | <b>5</b>  |
| <b>Synthesis of ethyl (E)-4-((1S,6R)-8-decylbicyclo[4.2.0]octa-2,4-dien-7-yl)but-2-enoate (7a,7b)</b> | <b>6</b>  |
| <b>Synthesis of (E)-5-((1S,6R)-8-decylbicyclo[4.2.0]octa-2,4-dien-7-yl)pent-3-en-2-one (8a,8b)</b>    | <b>7</b>  |
| <b>Synthesis of Beilcyclone A (2)</b>                                                                 | <b>8</b>  |
| <b>NMR spectra</b>                                                                                    | <b>9</b>  |
| <b>Tables of NMR data</b>                                                                             | <b>17</b> |
| <b>Computational Studies</b>                                                                          | <b>21</b> |
| <b>References</b>                                                                                     | <b>41</b> |

## **General Procedures**

NMR analysis was conducted using either an Agilent 600 MHz DD2 console with an Oxford 600 MHz magnet and Agilent cryoprobe, a *Bruker Advance III-HD* 600 MHz, and an *Agilent* 500 MHz. Chemical shifts are referenced to the residual solvent resonance as the internal standard ( $\text{CDCl}_3$ :  $\delta = 7.26$  ppm for  $^1\text{H}$  NMR and  $\delta = 77.16$  ppm for  $^{13}\text{C}$  NMR). Data are reported as follows: chemical shift, multiplicity (brs = broad singlet, s = singlet, d = doublet, t = triplet, q = quartet, m = multiplet). The assignment of signals was assisted correlated spectroscopy (COSY), heteronuclear single quantum coherence (HSQC). High-resolution mass spectroscopy was recorded using an Agilent 6230 TOF LC/MS (ESI). Infra-red spectra were recorded using a *PerkinElmer spectrum 100* FTIR spectrometer equipped with a zinc selenide crystal. Cyclooctatetraene was obtained as a generous gift from Dr Graham Gream (The University of Adelaide). The material was manufactured by BASF, most likely sometime in the 1970s. Samples were purified by vacuum distillation using a short vigrex column (20 mbar/ 60 °C) and stored in a freezer under an atmosphere of nitrogen. All other chemicals were purchased from commercial suppliers and used as received. All reactions were performed in flame-dried glassware using conventional Schlenk techniques under static pressure of nitrogen. Liquids and solutions were transferred with syringes.

Diethyl ether ( $\text{Et}_2\text{O}$ ) and tetrahydrofuran (THF) were purified by a Pure Solv<sup>TM</sup> Micro solvent purification system and stored over 4 Å molecular sieves under an atmosphere of nitrogen. 1,2-dichloroethane was dried through storage over 4 Å molecular sieves under an atmosphere of nitrogen. Toluene was dried following the rapid purification procedures outlined in *Purification of Laboratory Chemicals* (5<sup>th</sup> Edition, by Amarego and Chai), and stored over 4 Å molecular sieves under an atmosphere of nitrogen.

**Experimental Procedures****Synthesis of Cyclooctatriene oxide (3)**

Cyclooctatetraene oxide was synthesized according to the work of Pineschi and colleagues<sup>1</sup> starting from 5g of cyclooctatetraene. Product obtained as a yellow oil (71%).

**Synthesis of (2Z,4Z,7Z)-6-decylcycloocta-2,4,7-trien-1-ol (4)**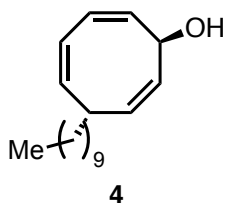

Under nitrogen atmosphere, an oven dried round bottom flask was charged with magnesium powder (989 mg, 40.7 mmol, 4.90 eq), anhydrous Et<sub>2</sub>O (5 mL), and 1,2-dibromoethane (20 μL). Upon activation of the magnesium 1-bromodecane (5.63 mL, 27.1 mmol, 3.30 eq) was added dropwise. The mixture was stirred for 2 h before being added dropwise to a stirred suspension of CuCN (2.68 g, 29.9 mmol, 3.60 eq) in anhydrous tetrahydrofuran (20 ml) at -18 °C. This was allowed to stir for an hour at -18 °C before a solution of COT-monoepoxide (1.00 g, 8.32 mmol, 1.00 eq) in anhydrous tetrahydrofuran (2 mL) was added. The resulting mixture was allowed to stir for a further hour at -18 °C. The reaction was quenched with saturated aqueous NH<sub>4</sub>Cl solution. The aqueous layers were extracted with Et<sub>2</sub>O and the organic layer was washed with distilled water and saturated NaCl solution. The organic phase was dried over MgSO<sub>4</sub> and the solvent was removed in vacuo. The desired product was purified through column chromatography using buffered silica and hexane/Et<sub>2</sub>O (9:1) as eluent. **4** was obtained as a yellow oil (2.1 g, 96%). **IR** (ATR):  $\nu/\text{cm}^{-1}$  = 3350, 3012, 2922, 2853, 1668, 1649, 1611, 1465, 1377, 1254, 1037, 771, 721, 669. **<sup>1</sup>H NMR** (600 MHz, CDCl<sub>3</sub>)  $\delta$ : 6.13 – 6.11 (1H, m), 6.09 – 6.07 (1H, m), 5.58 – 5.55 (1H, m), 5.39 – 5.34 (2H, m), 5.18 (1H, dd,  $J$  = 10.2, 7.0 Hz), 4.87 (1H, brs), 2.79 – 2.75 (1H, m), 2.09 (1H, brs), 1.55 – 1.51 (2H, m), 1.25 (18H, m), 0.87 (3H, t,  $J$  = 7.0 Hz). **<sup>13</sup>C NMR** (150 MHz, CDCl<sub>3</sub>)  $\delta$ : 132.9, 132.8, 132.3, 130.9, 127.5, 126.4, 70.0, 37.4, 36.4, 32.1, 29.8, 29.7, 29.5, 27.4, 22.8, 14.3. **HRMS** (ESI,  $m/z$ ) calculated for ([M]) C<sub>18</sub>H<sub>31</sub>O 262.2297 found 262.2265.

**Synthesis of (1Z,3Z,6Z)-5-decyl-8-(vinylloxy)cycloocta-1,3,6-triene (5)**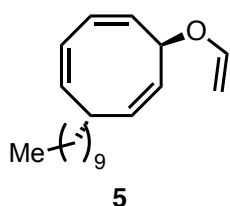

Under nitrogen atmosphere an oven dried round bottom flask was charged with AuClPPh<sub>3</sub> (47.1 mg, 95.3 μmol, 0.10 eq) AgOAc (15.9 mg, 95.3 μmol, 0.10 eq) and freshly distilled butyl vinyl ether (4 mL) The mixture was stirred at room temperature for 10 min before decyl alcohol **4** (250 mg, 952 μmol, 1.00 eq) and acetic acid (1.72 μL, 25.6 μmol, 0.03 eq) were added, and allowed to stir for 12 h. The reaction was diluted in diethyl ether and quenched with triethylamine (20 μL) before filtrated through a pad of Al<sub>2</sub>O<sub>3</sub>. The solvent was then removed at 28 °C in vacuo. Under nitrogen atmosphere another oven dried round bottom flask was

*Electronic Supplementary Information for Chemical Science*

charged with AuClPPh<sub>3</sub> (23.6 mg, 47.6 μmol, 0.05 eq.) AgOAc (7.95 mg, 47.6 μmol, 0.05 eq) and freshly distilled butyl vinyl ether (4 mL). The mixture was stirred at room temperature for 10 min before the crude material and acetic acid (0.86 μL, 12.8 μmol, 0.01 eq) were added. After 12 h, the reaction was quenched with triethylamine (20 μL) before filtrated through a pad of Al<sub>2</sub>O<sub>3</sub>. The solvent was then removed at 28 °C in vacuo and the product was used as impurified intermediate for the next step. **<sup>1</sup>H NMR** (600 MHz, CDCl<sub>3</sub>) δ: 6.35 (1H, dd, *J* = 14.3, 6.8, Hz), 6.18 – 6.16 (2H, m), 5.60 – 5.57 (1H, m), 5.45 – 5.42 (1H, m), 5.36 – 5.34 (1H, m), 5.23 – 5.20 (1H, m), 4.98 (1H, brs), 4.19 (1H, dd, *J* = 14.3, 1.8 Hz), 4.03 (1H, dd, *J* = 6.8, 1.8 Hz), 2.79 (1H, brs), 1.58 – 1.57 (3H, m), 1.26 (27H, m), 0.88 (5H, t, *J* = 7.0 Hz). **<sup>13</sup>C NMR** (150 MHz, CDCl<sub>3</sub>) δ: 150.4, 132.8, 132.8, 129.7, 128.4, 127.5, 127.3, 88.9, 76.6, 37.6, 36.4, 32.1, 29.8, 29.7, 29.5, 27.4, 22.8, 14.3.

**Synthesis of 2-((1*S*,6*R*)-8-decylbicyclo[4.2.0]octa-2,4-dien-7-yl)acetaldehyde (6a, 6b)**

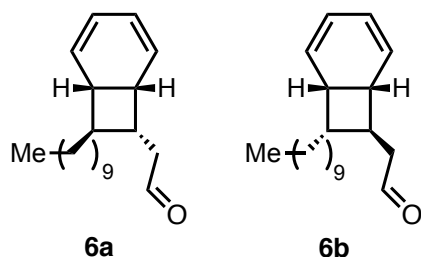

Under nitrogen atmosphere an oven dried round bottom flask was charged with **5** (270 mg) and anhydrous toluene (5 mL). The solution was heated at 60 °C overnight. Upon completion of the reaction the solvent was removed in vacuo. The crude material was purified by column chromatography using buffered silica and hexane/EtAOc (9:1)

as eluent (*R<sub>f</sub>* = 0.23), affording the aldehyde **6a** and **6b** as an inseparable ~2:1 mixture (**6a:6b** or **6b:6a**) as a yellow oil (134 mg, 48%, over two steps). **IR** (ATR):  $\nu/\text{cm}^{-1}$  = 3029, 2921, 2852, 2712, 1724, 1675, 1613, 1465, 1378, 1320, 1237, 1195, 998, 961, 814, 705, 663. **<sup>1</sup>H NMR** (600 MHz, CDCl<sub>3</sub>) δ: 9.77 (1H, s), 9.68 (0.5H, dd, *J* = 2.5 Hz), 5.89 - 5.85 (2H, m), 5.72 - 5.69 (1H, m), 5.67 - 5.64 (1H, m), 5.61 – 5.57 (2H, m), 5.42 - 5.40 (1H, m), 3.24 - 3.23 (1H, m), 3.18-3.14 (0.6H, m), 2.84 - 2.79 (2H, m), 2.70 - 2.62 (2H, m), 2.60 - 2.55 (2H, m), 2.53 - 2.8 (1H, m), 2.32 – 2.27 (1H, m), 1.59 – 1.42 (4H, m), 1.25 - 1.33 (33H, m), 0.88 (6H, t, *J* = 7.0 Hz). **<sup>13</sup>C NMR** (150 MHz, CDCl<sub>3</sub>) δ: 202.3, 201.7, 127.8, 126.5, 126.1, 125.6, 124.8, 124.3, 122.3, 121.4, 52.4, 51.5, 50.3, 45.8, 45.4, 44.5, 37.4, 36.9, 36.2, 35.1, 33.9, 32.1, 30.3, 29.9, 29.8, 29.8, 29.7, 29.5, 29.5, 28.3, 28, 22.8, 14.3. **HRMS** (ESI, *m/z*) calculated for ([M+Na]) C<sub>20</sub>H<sub>32</sub>O 311.2345 found 311.2319.

Synthesis of Endiandric acid J ester (**9**) in one pot starting from (**6a,6b**)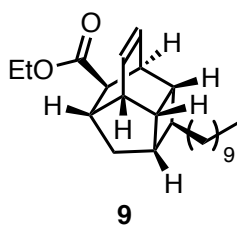

Under nitrogen atmosphere an oven dried round bottom flask was charged with **6a,6b** (16 mg, 91  $\mu\text{mol}$ , 1.0 eq) (carbomethoxymethylene)triphenylphosphorane (79.1 mg, 227  $\mu\text{mol}$ , 2.50 eq.) and anhydrous 1,2-dichloroethane (0.1 mL). The mixture was heated at 55  $^{\circ}\text{C}$  for 3 hrs. Anhydrous toluene (30 mL) was added and the reaction mixture was heated at 120  $^{\circ}\text{C}$  for 5 hrs. The solvent was removed in

vacuo and the crude material was purified by column chromatography using hexane/ $\text{Et}_2\text{O}$  (1%) as eluents ( $R_f = 0.21$ ). The desired product was obtained as a colorless oil (12 mg, 54%, over two steps). **IR** (ATR):  $\nu/\text{cm}^{-1} = 2956, 2923, 2853, 1736, 1611, 1532, 1465, 1367, 1305, 1205, 1179, 1042, 790, 691$ .  **$^1\text{H NMR}$**  (600 MHz,  $\text{CDCl}_3$ )  $\delta$ : 6.21 - 6.15 (2H, m), 4.13 - 4.03 (2H, m), 3.02 - 2.99 (1H, m), 2.80 (1H, d,  $J = 3.8$  Hz), 2.67 (1H, d,  $J = 5.5$  Hz), 2.58 (1H, dd,  $J = 6.9$  Hz), 2.36 - 2.33 (1H, m), 2.23 - 2.21 (1H, m), 1.91 - 1.87 (1H, m), 1.66 - 1.60 (2H, m), 1.53 - 1.43 (2H, m), 1.26 (21H, m), 0.88 (3H, t,  $J = 7.0$  Hz).  **$^{13}\text{C NMR}$**  (150 MHz,  $\text{CDCl}_3$ )  $\delta$ : 175, 131.9, 131.4, 60.3, 49.3, 42.1, 40.4, 40.3, 39.7, 39.6, 38.7, 38.5, 36.5, 35.3, 32.1, 29.9, 29.9, 29.8, 29.8, 29.5, 27.4, 22.8, 14.4, 14.2. **HRMS** (ESI,  $m/z$ ) calculated for ( $[\text{M}+\text{Na}]$ )  $\text{C}_{24}\text{H}_{38}\text{O}_2$  381.2764 found 381.2707.

Synthesis of Endiandric acid J (**1**)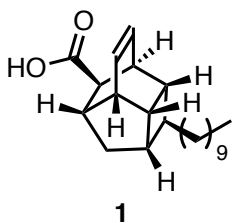

A 25 mL round bottom flask was charged with **9** (25 mg, 70  $\mu\text{mol}$ , 1.0 eq), lithium hydroxide (5.00 mg, 0.21 mmol, 3.00 eq), and THF/water/methanol in a ratio of 1:1:1 (10 mL). The reaction mixture was heated at 50  $^{\circ}\text{C}$  overnight. After reaction the solution was acidified until pH = 1 and extracted with ethyl acetate three times. The organic layer was washed with distilled water and saturated NaCl solution and dried

over  $\text{MgSO}_4$ . The solvent was evaporated in vacuo and the crude material was purified on column chromatography using hexane/ $\text{EAOC}$  (9:1) as eluent ( $R_f = 0.18$ ). The product was obtained as a colorless oil (18 mg, 72 %). **IR** (ATR):  $\nu/\text{cm}^{-1} = 3047, 2966, 2922, 2852, 1753, 1464, 1366, 1296, 1204, 1176, 1095, 1042, 855, 808, 719, 690$ .  **$^1\text{H NMR}$**  (600 MHz,  $\text{CDCl}_3$ )  $\delta$ : 6.25 - 6.20 (2H, m), 3.02 - 3.00 (1H, m), 2.87 (1H, d,  $J = 3.8$  Hz), 2.65 - 2.71 (1H, m), 2.54 (1H, t,  $J = 5.2$  Hz), 2.34 (1H, dt,  $J = 8.9, 5.5$  Hz), 2.23 (1H, t,  $J = 6.4$  Hz), 1.89 (1H, ddd,  $J = 12.9, 7.6, 5.4$  Hz), 1.66 - 1.68, (2H, m), 1.54 (1H, d,  $J = 12.7$  Hz), 1.43 - 1.51 (2H, m), 1.26 (16H, m), 0.88 (3H, t,  $J = 6.9$  Hz).  **$^{13}\text{C NMR}$**  (150 MHz,  $\text{CDCl}_3$ )  $\delta$ : 180.3, 132.1, 131.4, 49.1, 42.0, 40.4, 40.3, 39.8, 39.6, 38.7, 38.5, 36.5, 35.2, 32.1, 29.9, 29.9, 29.8, 29.8, 29.8, 29.5, 27.4, 22.9, 14.3. **HRMS** (ESI,  $m/z$ ) calculated for ( $[\text{M}+\text{K}]^+$ )  $\text{C}_{22}\text{H}_{34}\text{O}_2$  367.2608 found 367.2645.

Synthesis of Beilcyclone A (**2**) in one pot starting from (**6a,6b**)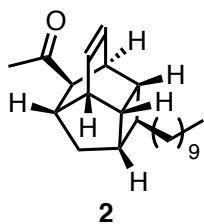

Under nitrogen atmosphere an oven dried round bottom flask was charged with **6a,6b** (16 mg, 91  $\mu\text{mol}$ , 1.0 eq) acetylmethylene-triphenylphosphorane (86.7 mg, 272  $\mu\text{mol}$ , 3.00 eq) and anhydrous 1,2-dichloroethane (0.1 mL). The mixture was heated at 40  $^{\circ}\text{C}$  for 24 h. anhydrous toluene (5 mL), and heated at 120  $^{\circ}\text{C}$  for 5 hrs. The solvent was removed in vacuo and the crude material was purified by column chromatography using hexane/ $\text{Et}_2\text{O}$  (1%) as eluents as eluent ( $R_f = 0.27$ ). The desired product was obtained as a colourless oil (12 mg, 61%, over two steps). **IR** (ATR):  $\nu/\text{cm}^{-1} = 2954, 2922, 2852, 1714, 1459, 1363, 160, 1169, 1019, 966, 802, 702, 665$ .  **$^1\text{H NMR}$**  (600 MHz,  $\text{CDCl}_3$ )  $\delta$ : 6.20 (1H, ddd,  $J = 8.0, 6.4, 1.0$  Hz), 6.11 (1H, ddd,  $J = 8.0, 6.4, 1.0$  Hz), 3.02 (1H, dt,  $J = 7.3, 4.1$  Hz), 2.78 (1H, d,  $J = 3.6$  Hz), 2.68 – 2.65 (2H, m), 2.35 (1H, dt,  $J = 9.8, 5.4$  Hz), 2.23 (1H, dt,  $J = 6.3, 3.5$  Hz), 2.12 (3H, s), 1.89 (1H, ddd,  $J = 12.7, 7.5, 5.2$  Hz), 1.69 – 1.64 (2H, m), 1.53 – 1.45 (2H, m), 1.26 (16H, brs), 0.88 (3H, t,  $J = 6.9$  Hz).  **$^{13}\text{C NMR}$**  (150 MHz,  $\text{CDCl}_3$ )  $\delta$ : 209.3, 132.4, 130.5, 57.9, 42.4, 40.4, 40.4, 40.1, 39.8, 38.5, 37.0, 36.5, 35.6, 32.1, 29.9, 29.9, 29.8, 29.8, 29.5, 28.5, 27.5, 22.8, 14.3. **HRMS** (ESI,  $m/z$ ) calculated for ( $[\text{M}+\text{Na}]$ )  $\text{C}_{24}\text{H}_{38}\text{O}_2$  351.2658 found 351.2687.

Synthesis of ethyl (*E*)-4-((1*S*,6*R*)-8-decylbicyclo[4.2.0]octa-2,4-dien-7-yl)but-2-enoate (**7a,7b**)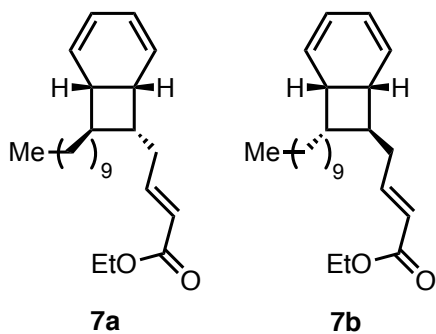

Under nitrogen atmosphere an oven dried round bottom flask was charged with **6a,6b** (60.0 mg, 208  $\mu\text{mol}$ , 1.00 eq) (carbomethoxymethylene)triphenylphosphorane (181 mg, 519  $\mu\text{mol}$ , 2.50 eq.) and anhydrous 1,2-dichloroethane (0.2 mL). The mixture was heated at 55  $^{\circ}\text{C}$  for 3 hrs. After reaction the solvent was removed in vacuo. The crude material was purified by column chromatography using hexane/ $\text{Et}_2\text{O}$  (9.5:0.5) as eluent ( $R_f = 0.23$ )

affording **7a** and **7b** as an inseparable ~1:1 mixture (**7a:7b** or **7b:7a**) as a colorless oil (50 mg, 67%). **IR** (ATR):  $\nu/\text{cm}^{-1} = 3030, 2921, 2852, 1721, 1653, 1465, 1366, 1320, 1306, 1264, 1192, 1149, 1095, 1042, 979, 850, 718$ .  **$^1\text{H NMR}$**  (600 MHz,  $\text{CDCl}_3$ )  $\delta$ : 6.94 – 6.84 (2H, m), 5.85 - 5.79 (4H, m), 5.65 - 5.63 (2H, m), 5.60 - 5.50 (4H, m), 4.19 – 4.15 (4H, m), 3.18 (1H, brs), 3.11 (0.8H, brs), 2.51 - 2.47 (4H, m), 2.42 - 2.25 (6H, m), 1.49 – 1.34 (4H, m), 1.25 (33H, m), 0.88 (7H, m).  **$^{13}\text{C NMR}$**  (150 MHz,  $\text{CDCl}_3$ )  $\delta$ : 166.8, 166.7, 148.5, 147.5, 127.6, 126.8, 126.7, 125.9, 124.6, 124.1, 122.1, 122, 121.7, 121.3, 60.3, 52.5, 51.1, 50.7, 49.5, 38.6, 37.2, 36.7, 36.3, 34.5, 34.2, 33.7, 32.1, 30.5, 30, 29.8, 29.8, 29.8, 29.8, 29.7, 29.5, 28.3, 28.2, 22.8, 14.4, 14.2. **HRMS** (ESI,  $m/z$ ) calculated for ( $[\text{M}+\text{Na}]$ )  $\text{C}_{22}\text{H}_{34}\text{O}_2$  311.2319 found 311.2345.

Synthesis of (*E*)-5-((1*S*,6*R*)-8-decylbicyclo[4.2.0]octa-2,4-dien-7-yl)pent-3-en-2-one (**8a**,**8b**)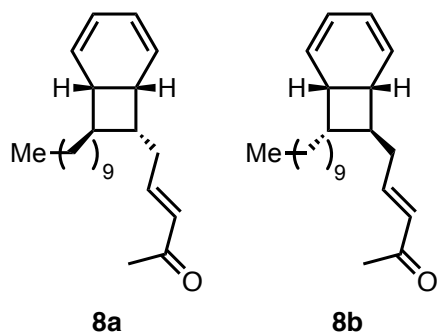

Under nitrogen atmosphere an oven dried round bottom flask was charged with **6a,6b** (10.0 mg, 34.7  $\mu\text{mol}$ , 1.00 eq.), acetylmethylene-triphenylphosphorane (33.1 mg, 100  $\mu\text{mol}$ , 3.00 eq) and anhydrous 1,2-dichloroethane (0.1 mL). The mixture was heated at 40 °C for 24 h. After reaction the solvent was removed in vacuo. The crude material was purified by column chromatography using hexane/Et<sub>2</sub>O (9.5:0.5) as eluent ( $R_f = 0.30$ ) affording the desired compound as a colourless oil (6.2 mg, 57%). **IR** (ATR):  $\nu/\text{cm}^{-1} = 2921, 1721, 1653, 1465, 1192$ . **<sup>1</sup>H NMR** (600 MHz, CDCl<sub>3</sub>)  $\delta$ : 6.81 - 6.67 (2H, m), 6.07 (2H, dd,  $J = 15.8, 7.8$  Hz), 5.89 – 5.84 (2H, m), 5.68 – 5.64 (2H, m), 5.62 – 5.56 (2H, m), 5.53 – 5.48 (2H, m), 3.19 (1H, brs), 3.13 (0.9H, brs), 2.57 – 2.49 (3H, m), 2.46 – 2.27 (5H, m) 2.23 (5H, s), 1.49 – 1.36 (4H, m), 1.26 (35H, m), 0.88 (7H, m). **<sup>13</sup>C NMR** (150 MHz, CDCl<sub>3</sub>): 198.7, 147.6, 146.7, 132.1, 131.7, 127.7, 126.9, 126.5, 125.8, 124.7, 124.2, 122.1, 121.3, 52.5, 51.3, 50.8, 49.5, 39.1, 37.2, 36.8, 36.4, 34.6, 34.2, 34.0, 32.1, 30.6, 30.0, 29.9, 29.8, 29.8, 29.5, 28.4, 28.2, 22.9, 14.3. **HRMS** (ESI,  $m/z$ ) calculated for ([M+Na]) C<sub>24</sub>H<sub>38</sub>O<sub>2</sub> 329.2839 found 329.2838.

Synthesis of Endiandric ester **J** (**9**)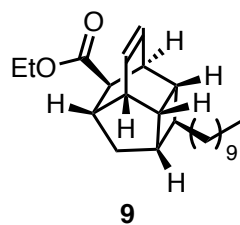

Under nitrogen atmosphere **7a,7b** (20 mg, 56  $\mu\text{mol}$ ) was dissolved in anhydrous toluene (20 mL), and heated at 120 °C for 5 hrs. The solvent was removed in vacuo and the crude material was purified by column chromatography using hexane/Et<sub>2</sub>O (1%) as eluents ( $R_f = 0.21$ ). The desired product was obtained as a colorless oil (17 mg, 85%). **IR** (ATR):  $\nu/\text{cm}^{-1} = 2956, 2923, 2853, 1736, 1611, 1532, 1465, 1367, 1305, 1205, 1179, 1042, 790, 691$ . **<sup>1</sup>H NMR** (600 MHz, CDCl<sub>3</sub>)  $\delta$ : 6.21 - 6.15 (2H, m), 4.13 – 4.03 (2H, m), 3.02 – 2.99 (1H, m), 2.80 (1H, d,  $J = 3.8$  Hz), 2.67 (1H, d,  $J = 5.5$  Hz), 2.58 (1H, dd,  $J = 6.9$  Hz), 2.36 – 2.33 (1H, m), 2.23 – 2.21 (1H, m), 1.91 – 1.87 (1H, m), 1.66 – 1.60 (2H, m), 1.53 – 1.43 (2H, m), 1.26 (21H, m), 0.88 (3H, t,  $J = 7.0$  Hz). **<sup>13</sup>C NMR** (150 MHz, CDCl<sub>3</sub>)  $\delta$ : 175, 131.9, 131.4, 60.3, 49.3, 42.1, 40.4, 40.3, 39.7, 39.6, 38.7, 38.5, 36.5, 35.3, 32.1, 29.9, 29.9, 29.8, 29.8, 29.5, 27.4, 22.8, 14.4, 14.2. **HRMS** (ESI,  $m/z$ ) calculated for ([M+Na]) C<sub>24</sub>H<sub>38</sub>O<sub>2</sub> 381.2764 found 381.2707.

Synthesis of Beilyclone A (**2**)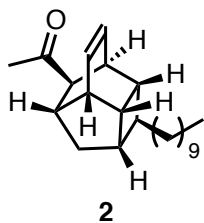

Under nitrogen atmosphere **8a,8b** (40.0 mg, 0.12 mmol) was dissolved in anhydrous toluene (30 mL), and heated at 120 °C for 5 hrs. The solvent was removed in vacuo and the crude material was purified by column chromatography using hexane/Et<sub>2</sub>O (1%) as eluents as eluent (*R<sub>f</sub>* = 0.27). The desired product was obtained as a colourless oil (25 mg, 62%). **IR** (ATR):  $\nu/\text{cm}^{-1}$  = 2954, 2922, 2852, 1714, 1459, 1363, 160, 1169, 1019,

966, 802, 702, 665. **<sup>1</sup>H NMR** (600 MHz, CDCl<sub>3</sub>)  $\delta$ : 6.20 (1H, ddd, *J* = 8.0, 6.4, 1.0 Hz), 6.11 (1H, ddd, *J* = 8.0, 6.4, 1.0 Hz), 3.02 (1H, dt, *J* = 7.3, 4.1 Hz), 2.78 (1H, d, *J* = 3.6 Hz), 2.68 – 2.65 (2H, m), 2.35 (1H, dt, *J* = 9.8, 5.4 Hz), 2.23 (1H, dt, *J* = 6.3, 3.5 Hz), 2.12 (3H, s), 1.89 (1H, ddd, *J* = 12.7, 7.5, 5.2 Hz), 1.69 – 1.64 (2H, m), 1.53 – 1.45 (2H, m), 1.26 (16H, brs), 0.88 (3H, t, *J* = 6.9 Hz). **<sup>13</sup>C NMR** (150 MHz, CDCl<sub>3</sub>)  $\delta$ : 209.3, 132.4, 130.5, 57.9, 42.4, 40.4, 40.4, 40.1, 39.8, 38.5, 37.0, 36.5, 35.6, 32.1, 29.9, 29.9, 29.8, 29.8, 29.5, 28.5, 27.5, 22.8, 14.3. **HRMS** (ESI, *m/z*) calculated for ([M+Na]) C<sub>24</sub>H<sub>38</sub>O<sub>2</sub> 351.2658 found 351.2687.



## NMR spectra

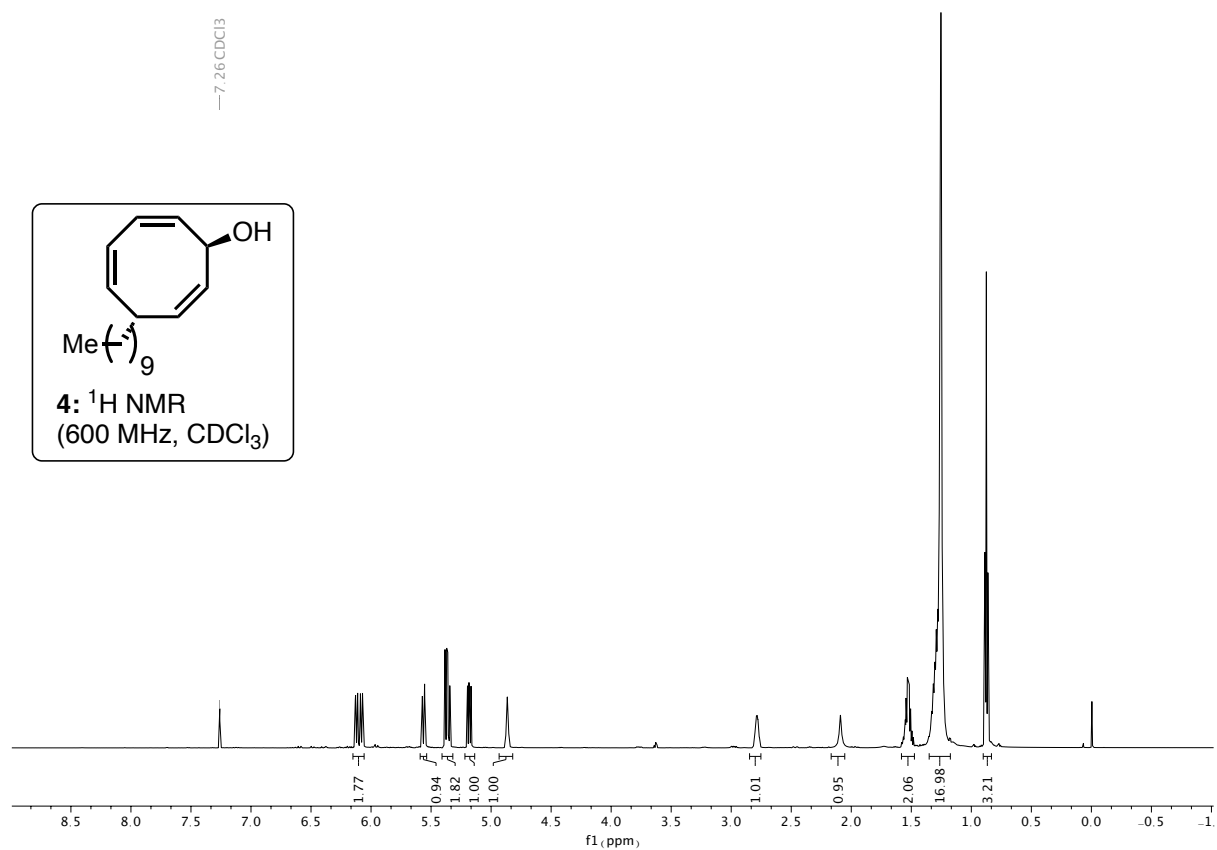Figure 1: <sup>1</sup>H NMR of 4.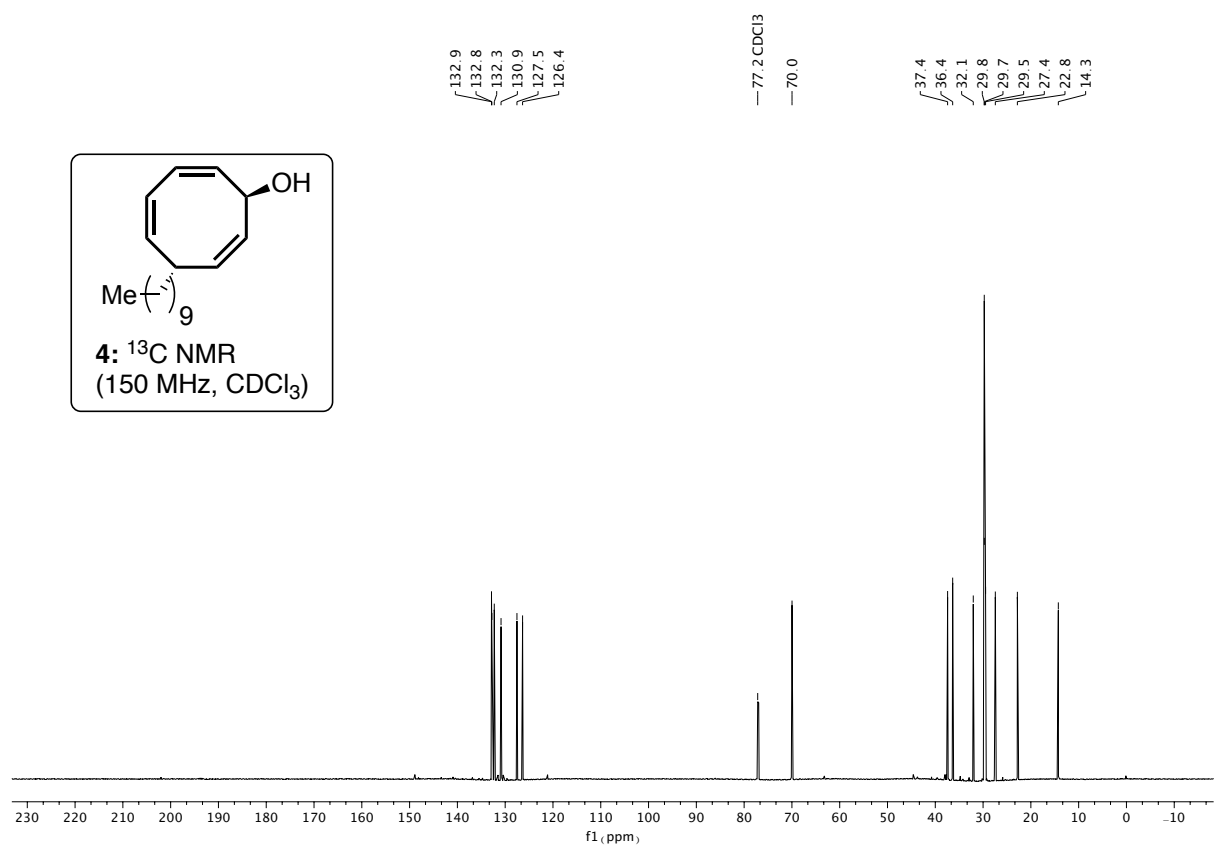Figure 2: <sup>13</sup>C NMR of 4.

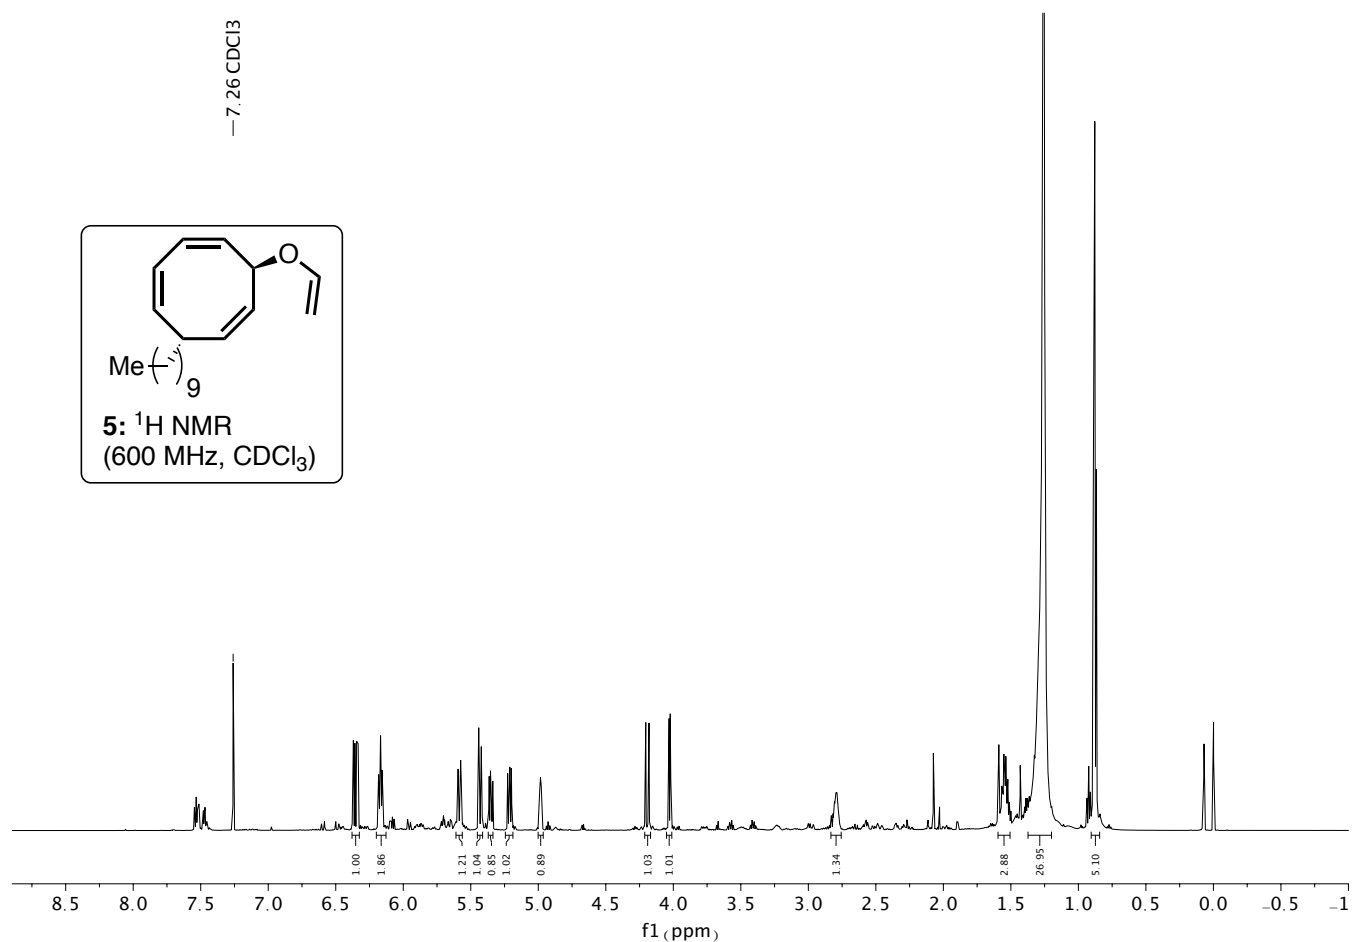

Figure 3: <sup>1</sup>H NMR of 5.

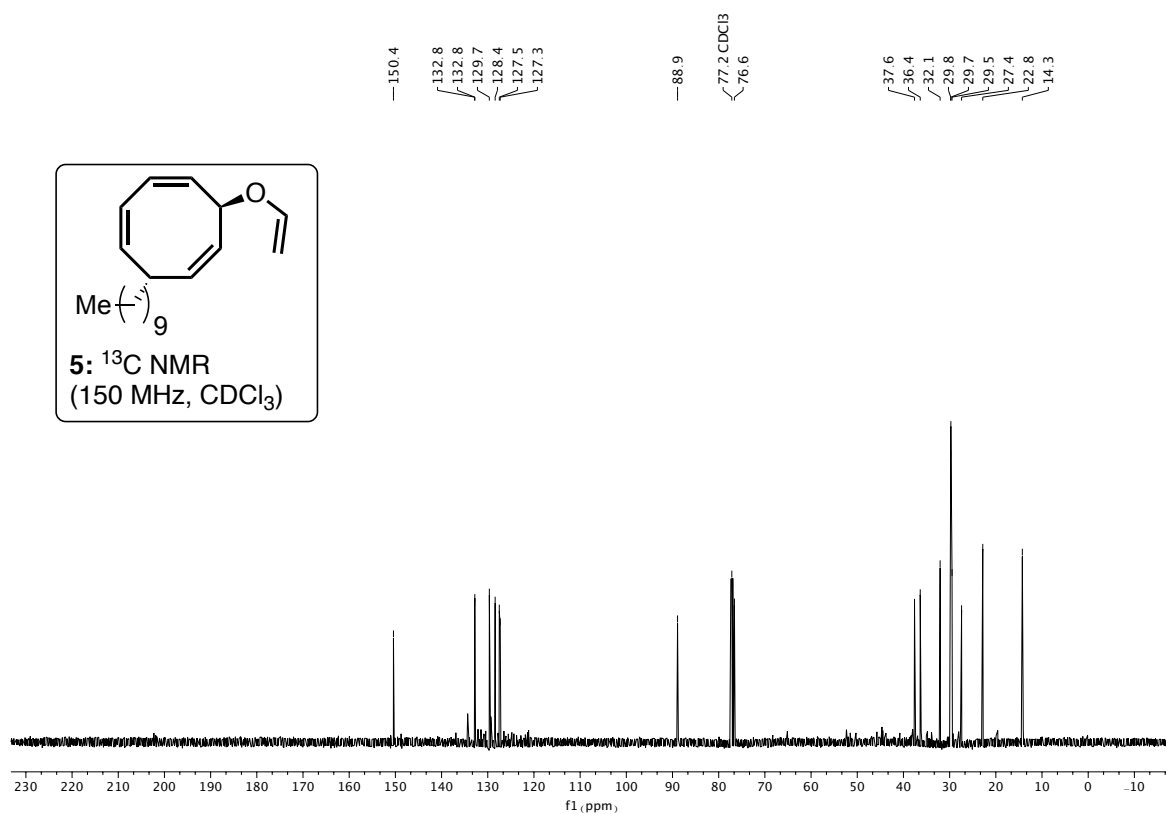

Figure 4: <sup>13</sup>C NMR of 5.

—7.26 CDCl<sub>3</sub>

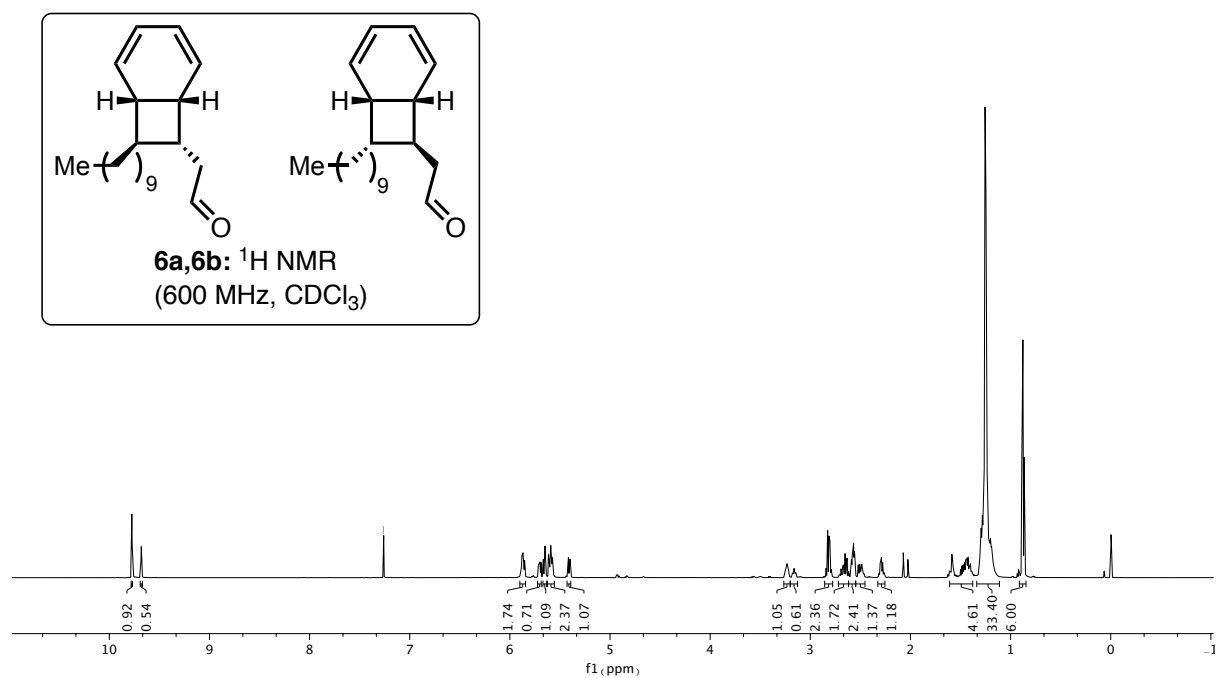

Figure 5: <sup>1</sup>H NMR of 6a,6b.

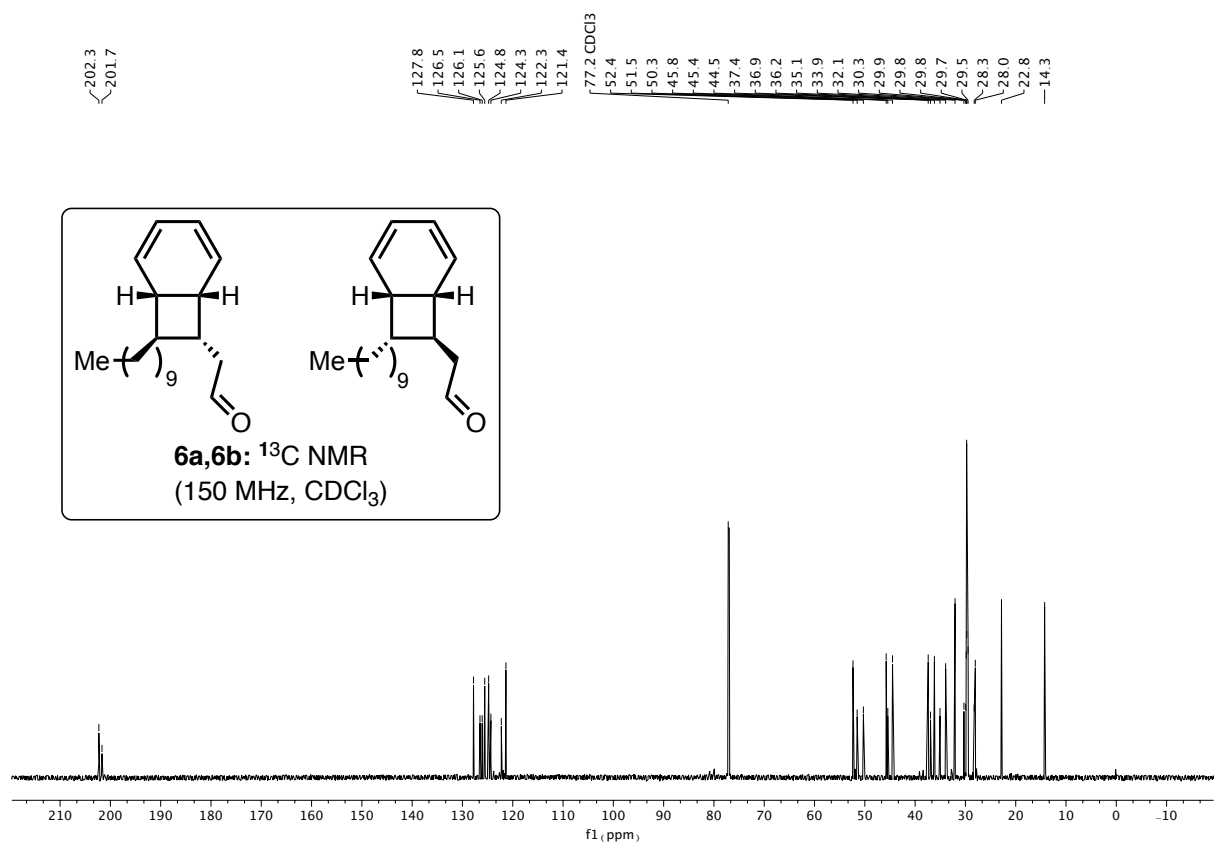

Figure 6: <sup>13</sup>C NMR of 6a,6b.

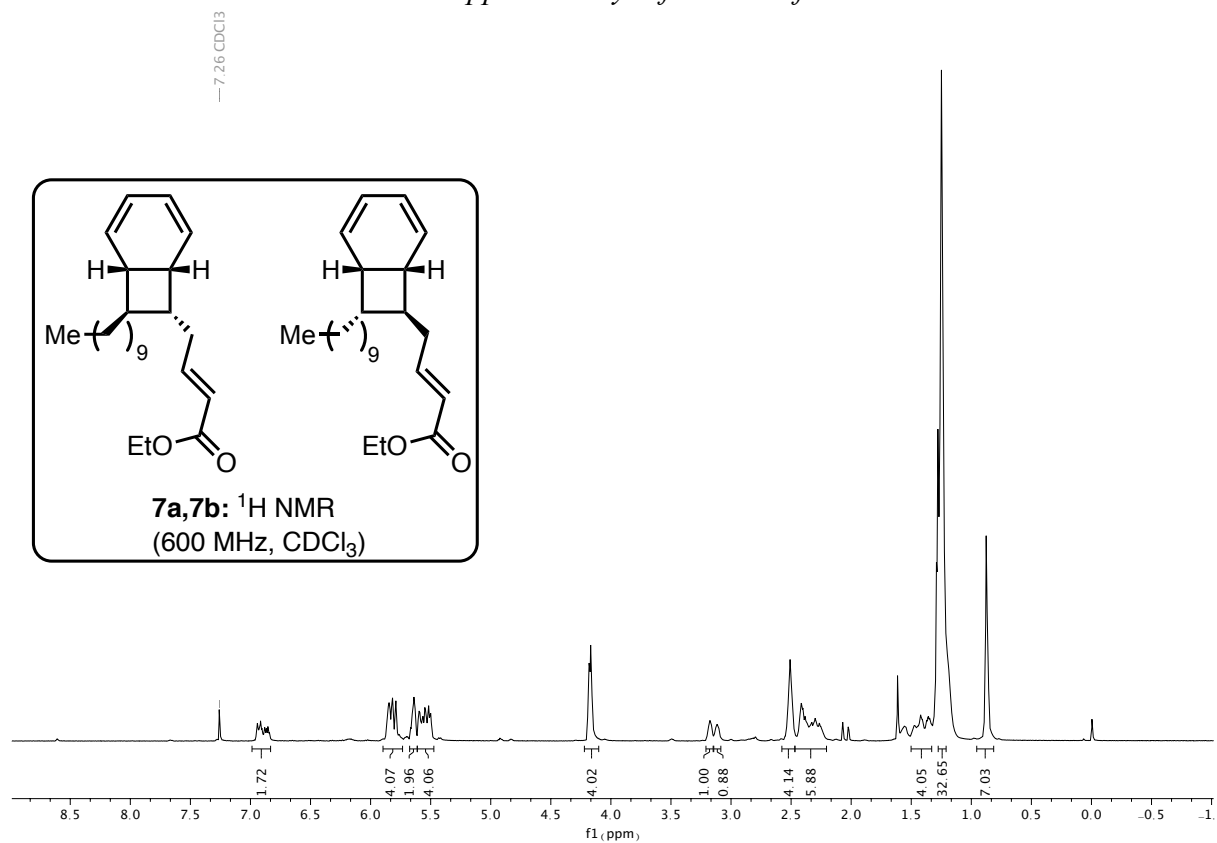

Figure 7: <sup>1</sup>H NMR of 7a,7b.

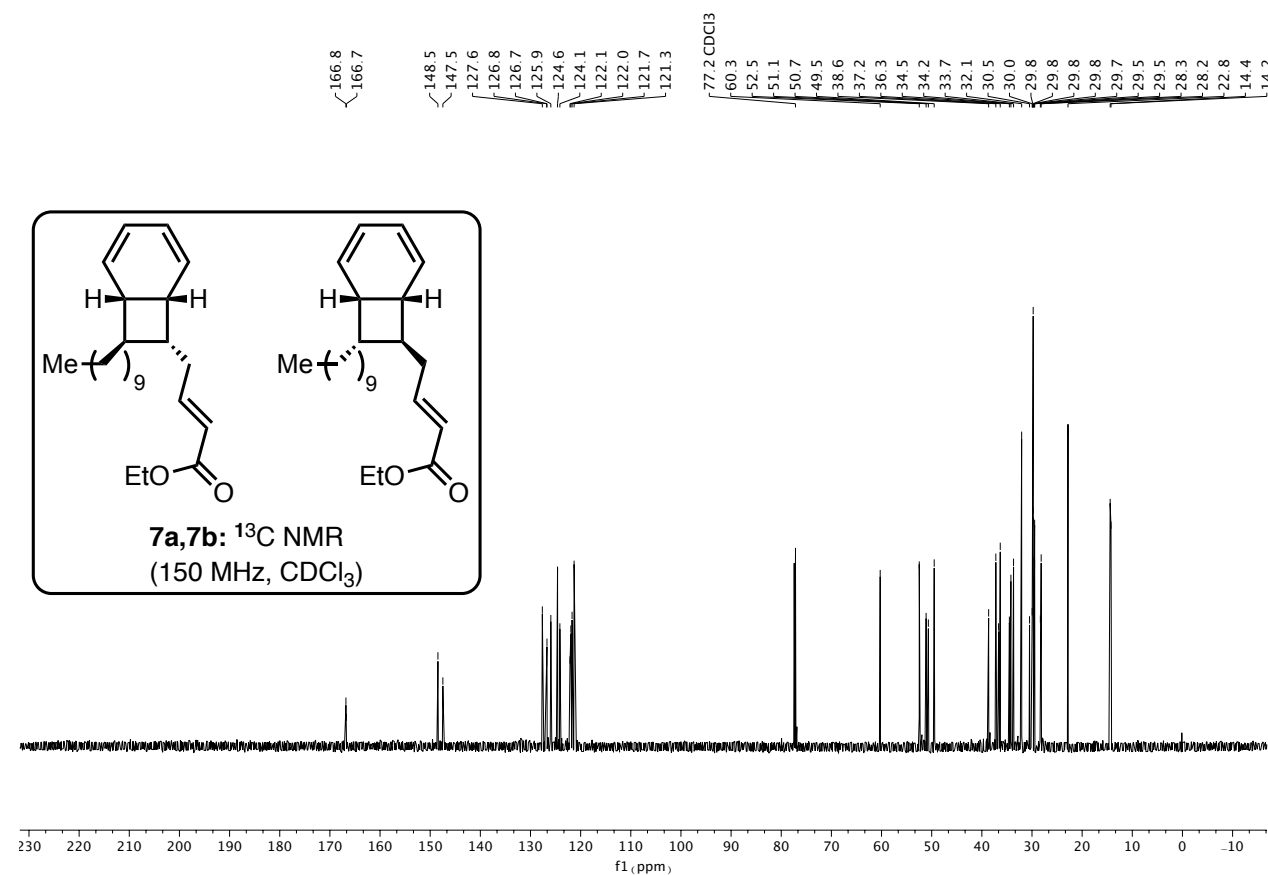

Figure 8: <sup>13</sup>C NMR of 7a,7b.

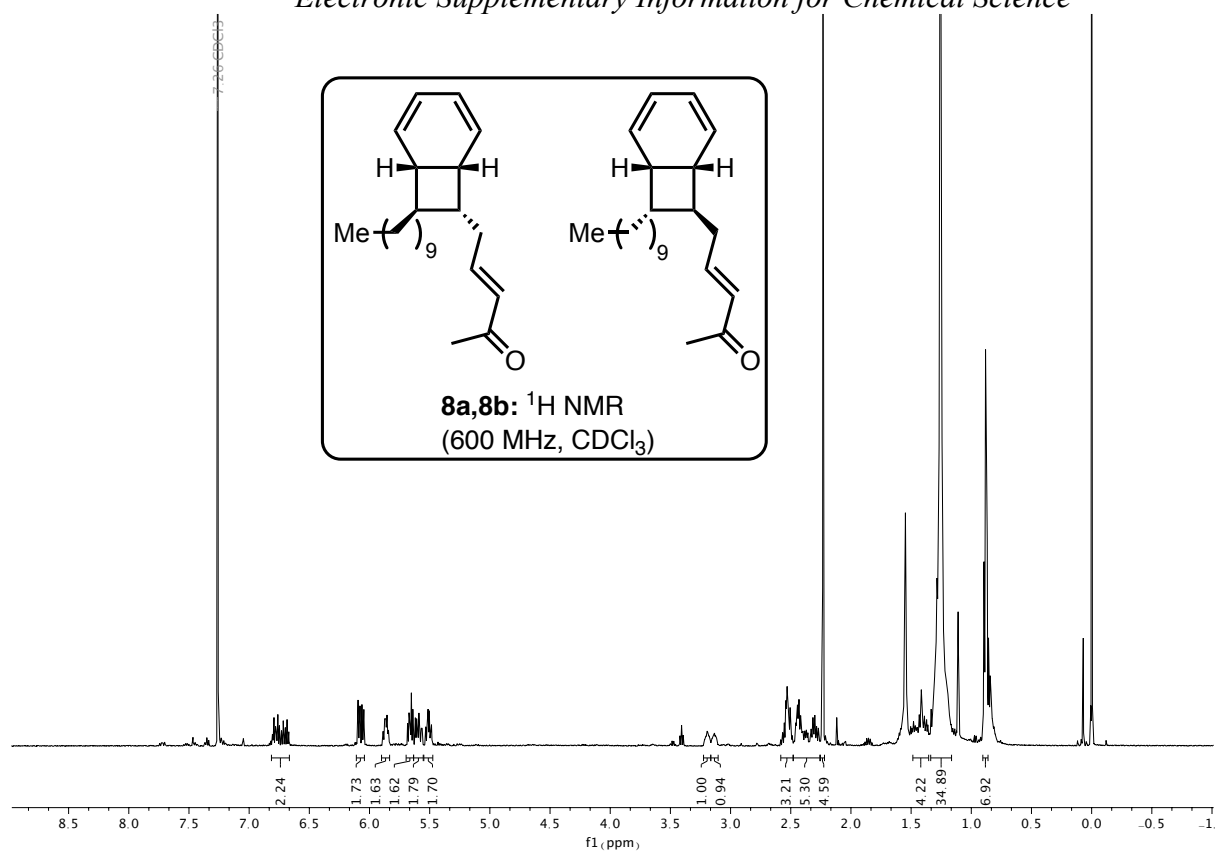

Figure 9: <sup>1</sup>H NMR of 8a,8b.

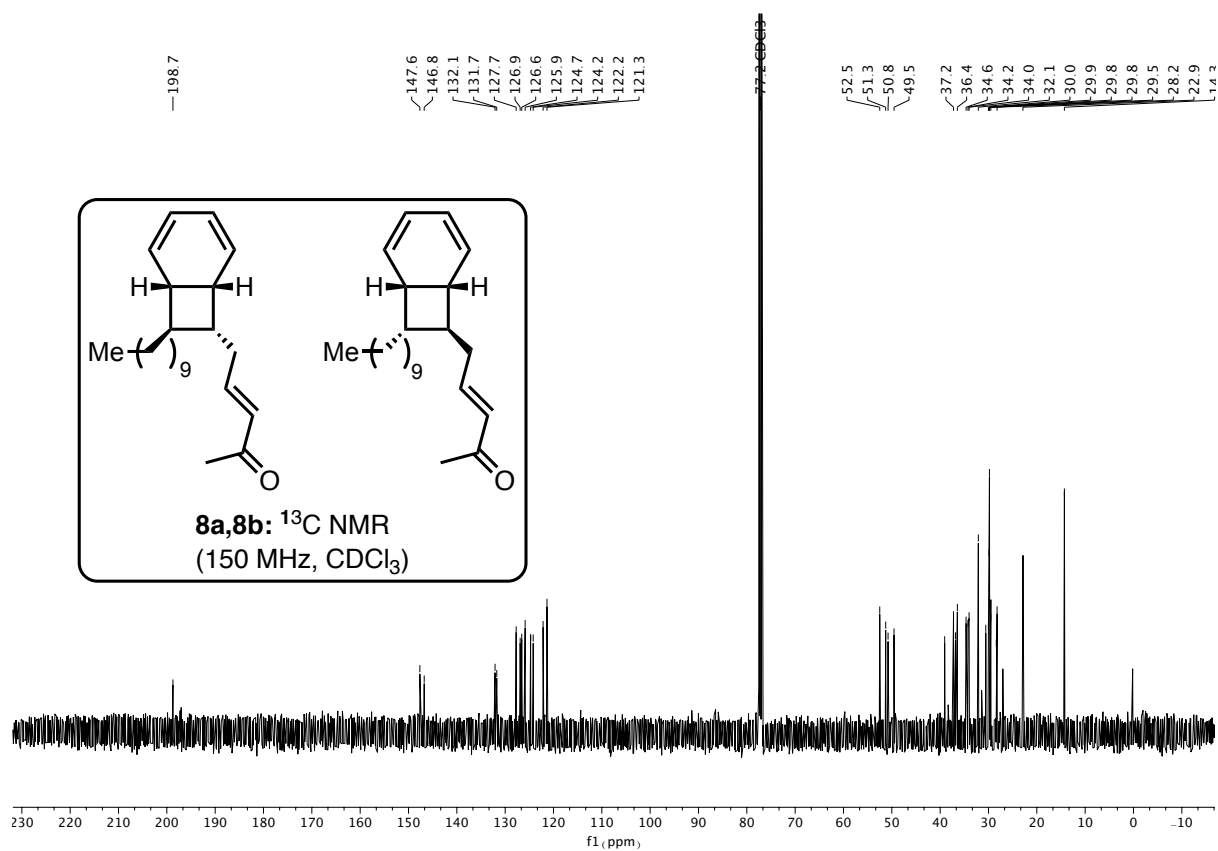

Figure 10: <sup>13</sup>C NMR of 8a,8b.

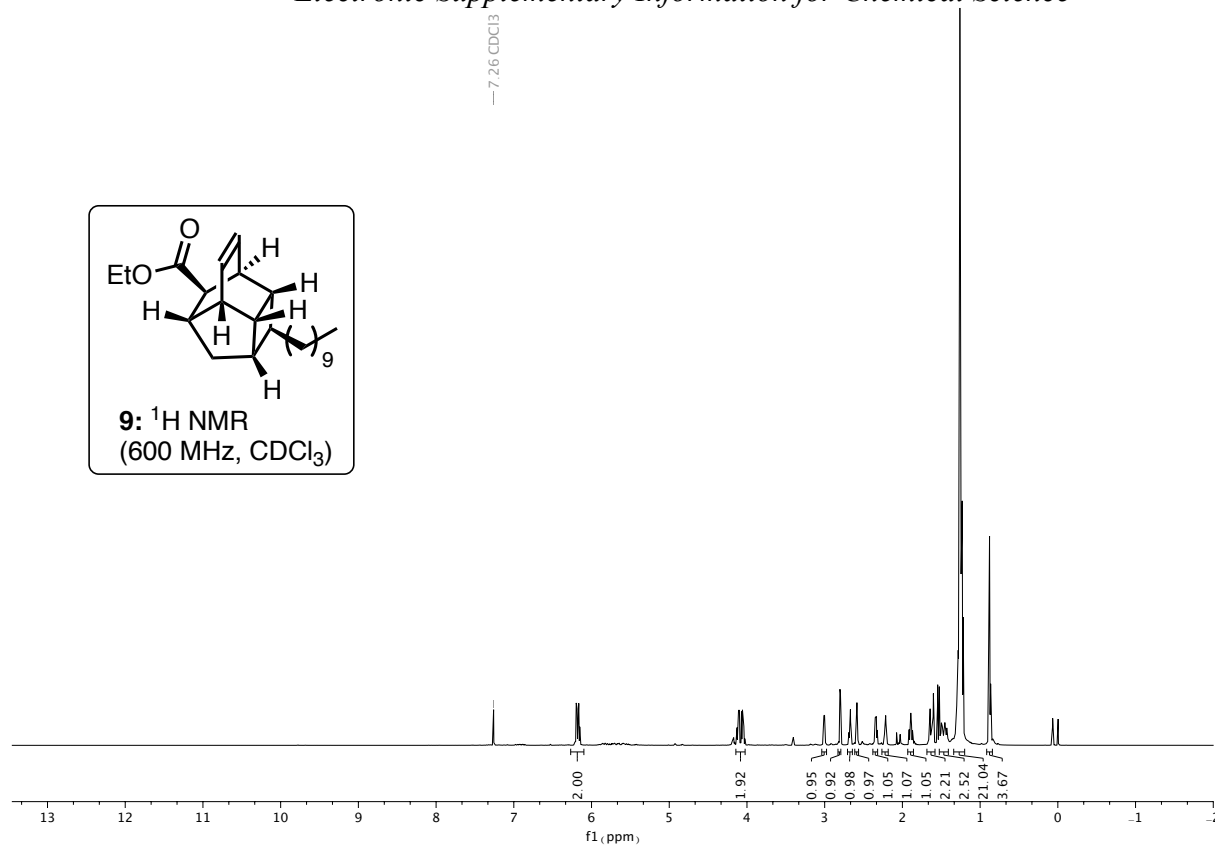

Figure 11:  $^1\text{H}$  NMR of **9**.

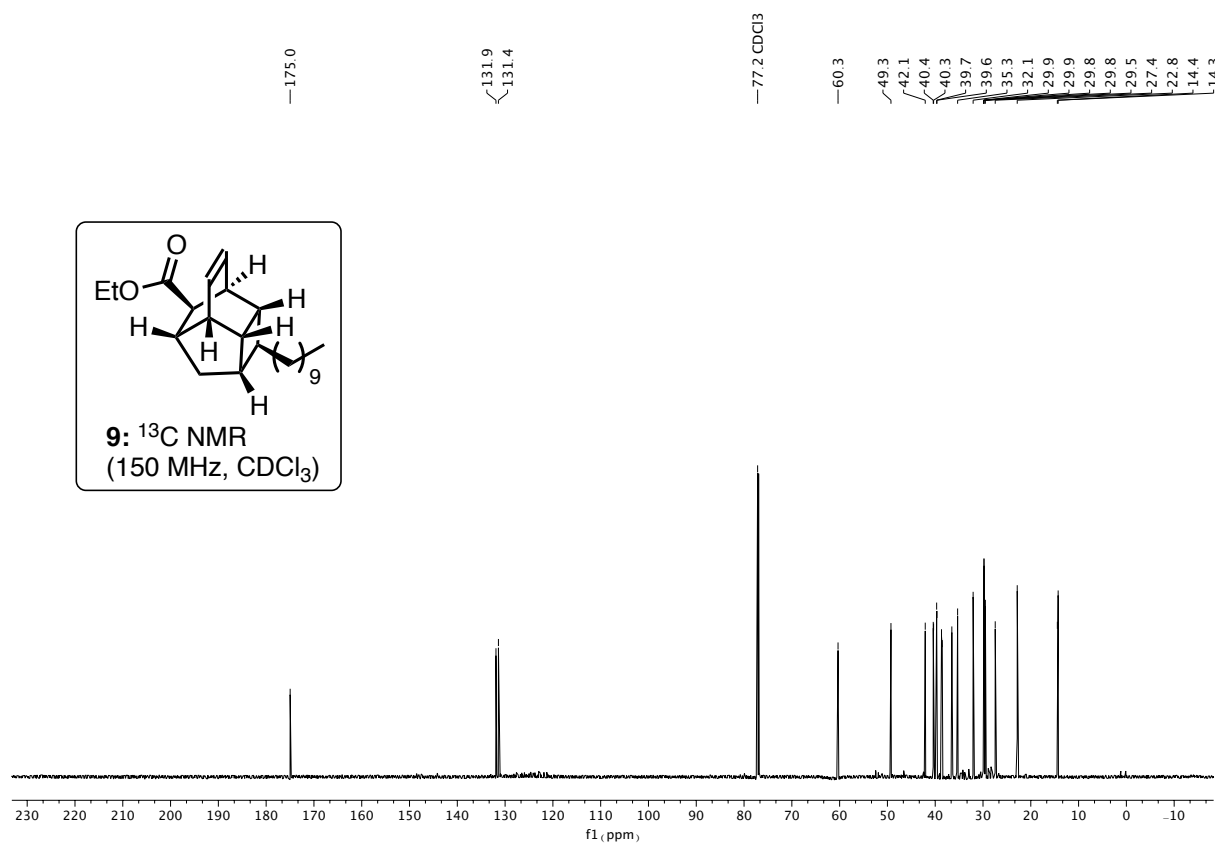

Figure 12:  $^{13}\text{C}$  NMR of **9**.

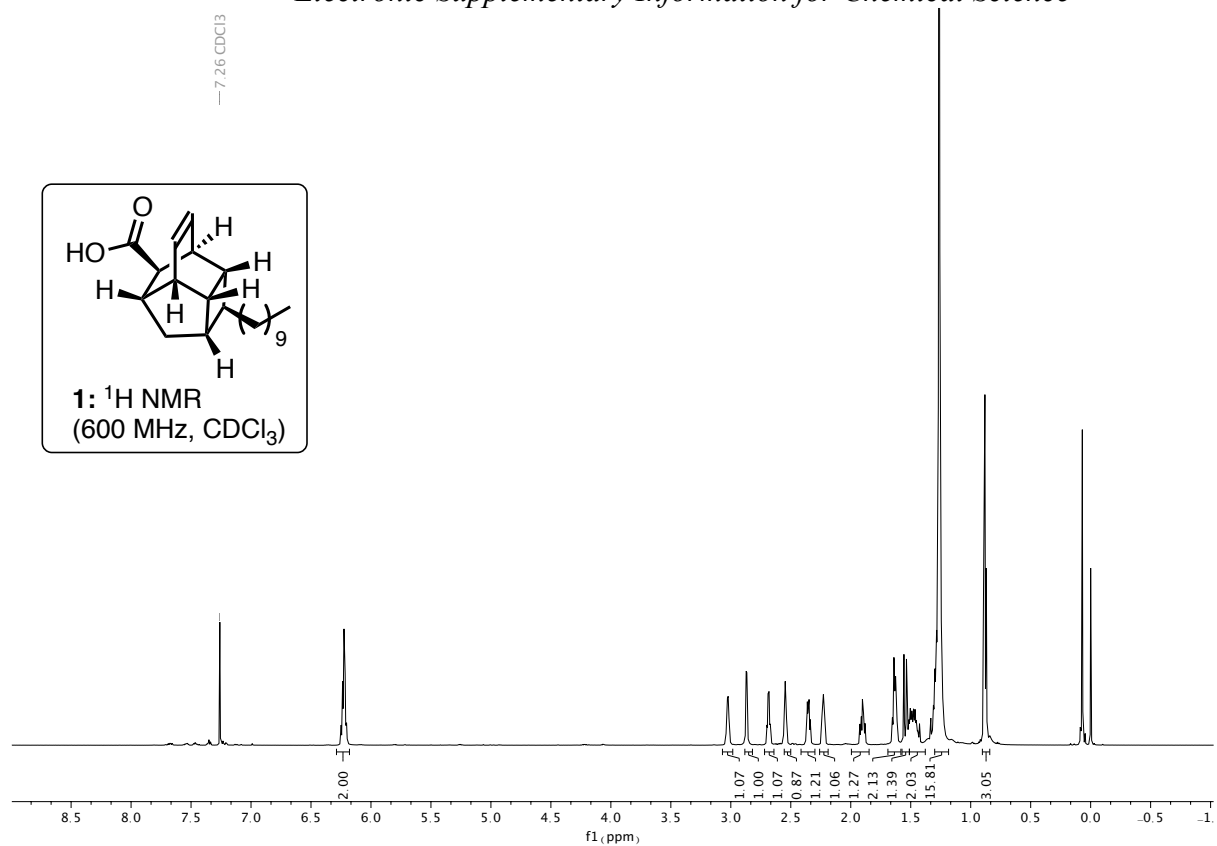

**Figure 13:** <sup>1</sup>H NMR of Endiandric acid J.

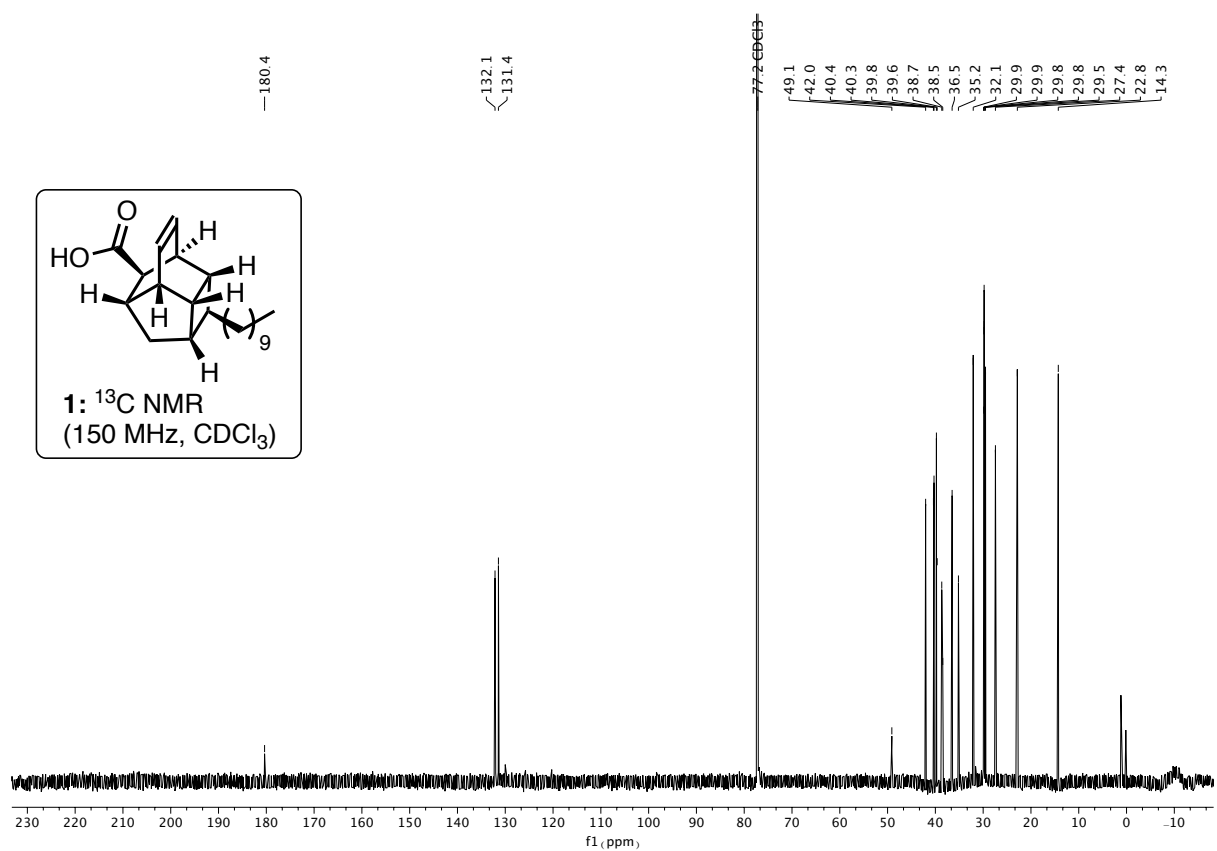

**Figure 14:** <sup>13</sup>C NMR of Endiandric acid J.

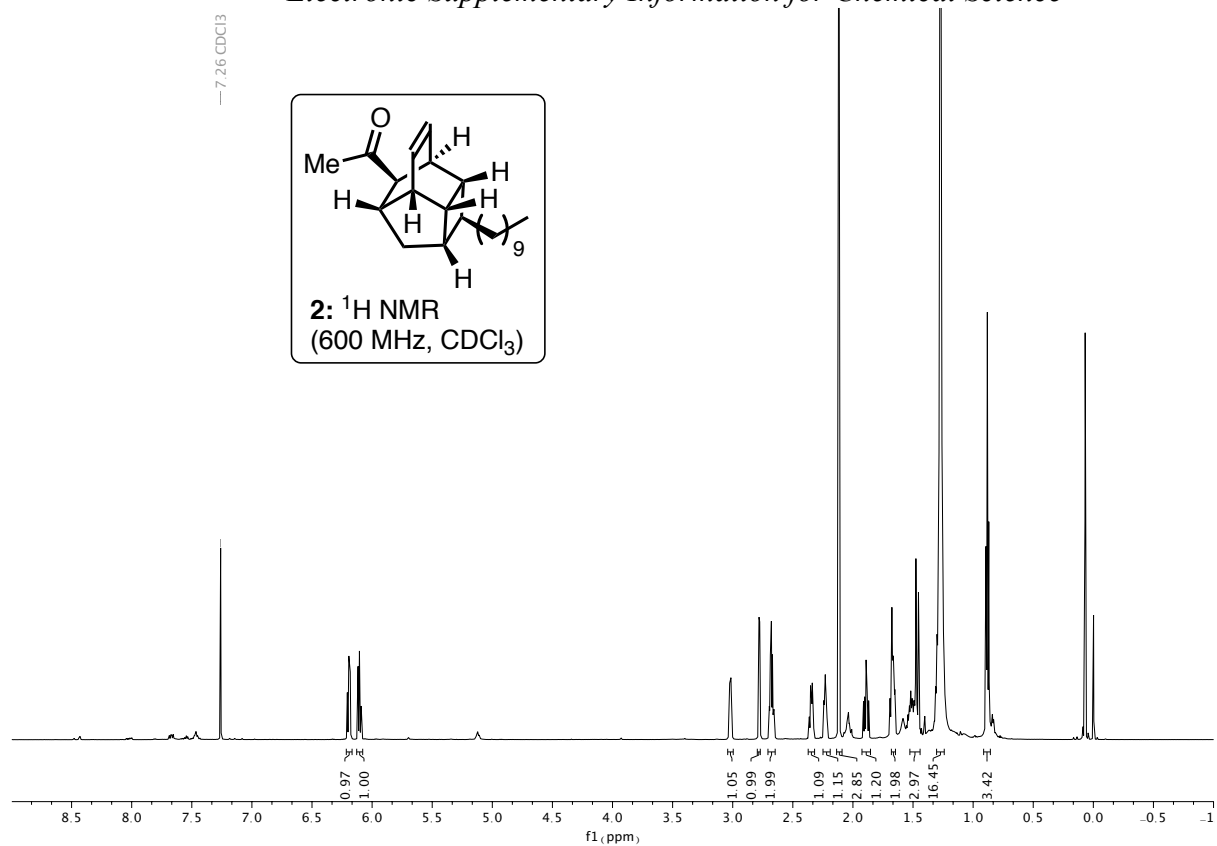

Figure 15: <sup>1</sup>H NMR of Beilicyclone A.

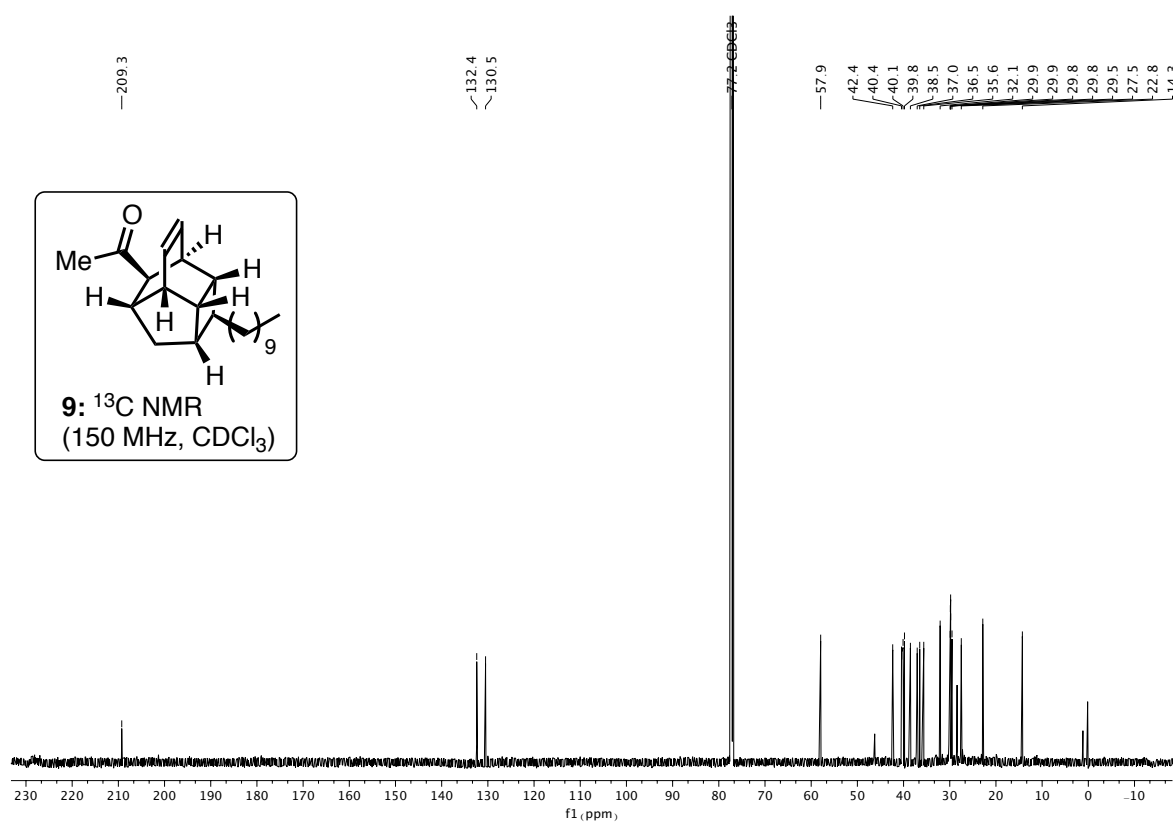

Figure 16: <sup>13</sup>C NMR of Beilicyclone A.



## Tables of NMR data

Table of  $^1\text{H}$  and  $^{13}\text{C}$  NMR data of natural and synthetic Endiandric acid J (**1**).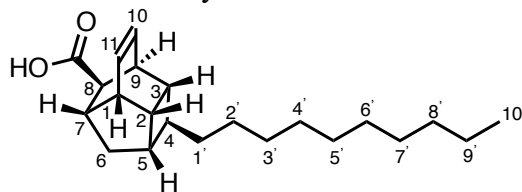Endiandric Acid J (**1**)

| <b><math>^1\text{H}</math> NMR of Endiandric acid J</b> |                                         |                                     |
|---------------------------------------------------------|-----------------------------------------|-------------------------------------|
| <b>Assignment</b>                                       | <b>Synthetic (600 MHz)</b>              | <b>Natural (400 MHz)</b>            |
| 11                                                      | 6.19 – 6.26 (1H, m),                    | 6.23 (ddd $J = 10.0, 8.0, 2.0$ Hz)  |
| 10                                                      | 6.19 – 6.26 (1H, m)                     | 6.23 (ddd, $J = 10.0, 8.0, 2.0$ Hz) |
| 9                                                       | 3.02 – 3.00 (1H, m)                     | 3.02 (dt, $J = 7.2, 4.8$ Hz)        |
| 8                                                       | 2.87 (1H, d, $J = 3.8$ Hz)              | 2.87 (d, $J = 4.0$ Hz)              |
| 1                                                       | 2.65 – 2.71 (1H, m)                     | 2.69 (ddd, $J = 7.2, 4.8, 2.0$ Hz)  |
| 7                                                       | 2.54 (1H, t, $J = 5.2$ Hz)              | 2.54 (t, $J = 5.2$ Hz)              |
| 2                                                       | 2.34 (1H, dt, $J = 8.9, 5.5$ Hz)        | 2.35 (dt, $J = 8.4, 5.6$ Hz)        |
| 5                                                       | 2.23 (1H, br. t, $J = 6.4$ Hz)          | 2.23 (br. t, $J = 6.8$ Hz)          |
| 6                                                       | 1.89 (1H, ddd, $J = 12.9, 7.6, 5.4$ Hz) | 1.90 (ddd, $J = 12.6, 7.6, 5.6$ Hz) |
| 3                                                       | 1.66 – 1.68, (1H, m),                   | 1.61 – 1.66 (m)                     |
| 4                                                       | 1.66 – 1.68, (1H, m),                   | 1.61 – 1.66, m                      |
| 6                                                       | 1.54 (1H, d, $J = 12.7$ Hz),            | 1.54 (d, $J = 12.6$ Hz)             |
| 1'                                                      | 1.43 – 1.51 (2H, m),                    | 1.43 – 1.50 (m)                     |
| 2' – 9'                                                 | 1.26 (16H, m)                           | 1.26 (br. S)                        |
| 10'                                                     | 0.88 (3H, t, $J = 6.9$ Hz)              | 0.88 (t, $J = 6.6$ Hz)              |

*Electronic Supplementary Information for Chemical Science* **$^{13}\text{C}$  NMR of Endiandric acid J**

| <b>Assignment</b> | <b>Synthetic</b> | <b>Natural</b> |
|-------------------|------------------|----------------|
| C=O               | 180.3            | 180.1          |
| H-C               | 132.1            | 131.9          |
| H-C               | 131.4            | 131.3          |
| H-C               | 49.1             | 48.9           |
| H-C               | 42.0             | 41.8           |
| H-C               | 40.4             | 40.1           |
| H-C               | 40.3             | 39.4           |
| H-C               | 39.8             | 39.6           |
| H-C               | 39.6             | 38.5           |
| H-C               | 38.7             | 38.2           |
| CH <sub>2</sub>   | 36.5             | 36.3           |
| H-C               | 35.2             | 35.0           |
| CH <sub>2</sub>   | 32.1             | 31.9           |
| CH <sub>2</sub>   | 29.9             | 29.4 – 29.7    |
| CH <sub>2</sub>   | 29.9             | 29.4 – 29.7    |
| CH <sub>2</sub>   | 29.9             | 29.4 – 29.7    |
| CH <sub>2</sub>   | 29.8             | 29.4 – 29.7    |
| CH <sub>2</sub>   | 29.8             | 29.4 – 29.7    |
| CH <sub>2</sub>   | 29.8             | 29.4 – 29.7    |
| CH <sub>2</sub>   | 29.8             | 29.4 – 29.7    |
| CH <sub>2</sub>   | 29.5             | 29.4 – 29.7    |
| CH <sub>2</sub>   | 27.4             | 27.3           |
| CH <sub>2</sub>   | 22.9             | 22.7           |
| CH <sub>3</sub>   | 14.3             | 14.1           |

Table of  $^1\text{H}$  and  $^{13}\text{C}$  NMR data of natural and synthetic Beilcyclone A (2).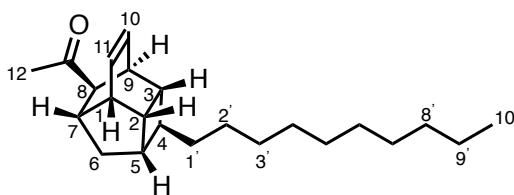

Beilcyclone A (2)

| $^1\text{H}$ NMR of Bilcyclone A |                                         |                                     |
|----------------------------------|-----------------------------------------|-------------------------------------|
| Assignment                       | Synthetic (600 MHz)                     | Natural (600 MHz)                   |
| 11                               | 6.20 (1H, ddd, $J = 8.0, 6.4, 1.0$ Hz)  | 6.20 (ddd, $J = 8.0, 6.4, 0.8$ Hz)  |
| 10                               | 6.11 (1H, ddd, $J = 8.0, 6.4, 1.0$ Hz)  | 6.10 (ddd, $J = 8.0, 6.0, 1.0$ Hz)  |
| 9                                | 3.02 (1H, dt, $J = 7.3, 4.1$ Hz)        | 3.02 (dt, $J = 6.0, 4.0$ Hz)        |
| 8                                | 2.78 (1H, d, $J = 3.6$ Hz)              | 2.78 (d, $J = 4.0$ Hz)              |
| 1 and 7                          | 2.68 – 2.65 (2H, m)                     | 2.68 (m)                            |
|                                  |                                         | 2.66 (m)                            |
| 2                                | 2.35 (1H, dt, $J = 9.8, 5.4$ Hz)        | 2.35 (dt, $J = 7.2, 6.0$ Hz)        |
| 5                                | 2.23 (1H, t, $J = 6.3$ Hz, 3.5 Hz)      | 2.23 (br. t, $J = 6.0$ Hz)          |
| 12                               | 2.12 (3H, s)                            | 2.12 (s)                            |
| 6                                | 1.89 (1H, ddd, $J = 12.7, 7.5, 5.2$ Hz) | 1.89 (ddd, $J = 12.8, 7.7, 5.0$ Hz) |
| 4 and 3                          | 1.69 – 1.64 (2H, m)                     | 1.64 – 1.70 (m)                     |
| 6                                | 1.53 – 1.45 (2H, m)                     | 1.52 (m)                            |
| 1'                               |                                         | 1.46 (d, $J = 12.8$ Hz)             |
| 2' – 9'                          | 1.26 (16H, br. s)                       | 1.27 (br. s)                        |
| 10'                              | 0.88 (3H, t, $J = 6.9$ Hz)              | 0.88 (t, $J = 6.9$ Hz)              |

*Electronic Supplementary Information for Chemical Science* **$^{13}\text{C}$  NMR of Beilcyclone A**

| <b>Assignment</b> | <b>Synthetic</b> | <b>Natural</b> |
|-------------------|------------------|----------------|
| C=O               | 209.3            | 209.2          |
| H-C               | 132.4            | 132.3          |
| H-C               | 130.5            | 130.3          |
| H-C               | 57.9             | 57.8           |
| H-C               | 42.4             | 42.2           |
| H-C               | 40.4             | 40.3           |
| H-C               | 40.1             | 40.2           |
| H-C               | 40.1             | 39.9           |
| H-C               | 39.8             | 39.6           |
| H-C               | 38.5             | 38.3           |
| H-C               | 37.0             | 36.9           |
| H-C               | 36.5             | 36.3           |
| H-C               | 35.6             | 35.5           |
| H-C               | 32.1             | 31.9           |
| CH <sub>2</sub>   | 29.9 – 29.5      | 29.4 – 29.8    |
| COCH <sub>3</sub> | 28.5             | 28.3           |
| CH <sub>2</sub>   | 27.5             | 27.3           |
| CH <sub>2</sub>   | 22.8             | 22.7           |
| CH <sub>3</sub>   | 14.3             | 14.1           |

## Computational Studies

Calculations were carried out with density functional theory (DFT) using Gaussian 16 (revision A.03).<sup>2</sup> Geometries were optimised in the gas phase at the M06-2X/6-31G(d) level.<sup>3</sup> Stable ground states and transition states were identified by the number of imaginary vibrational frequencies. Zero-point energies and thermal corrections at 333.15 K (**10-13**), 393.15 K (**14-17**) and 1 atm were determined from the unscaled frequencies. The transition states were shown to connect reactants and products using intrinsic reaction coordinate calculations.<sup>4</sup> Single-point energy calculations of the optimised geometries were carried out in the gas phase at the M06-2X/6-311+G(d,p) level and in toluene solvent using the SMD continuum solvent model<sup>5</sup> at the M06-2X/6-31G(d) level. The optimised geometries are given below in Cartesian coordinates and the energies given in units of Hartree. The Gibbs free energy in toluene solution at 333.15 K (**10-13**), and 393.15 K (**14-17**) was calculated as  $G_{\text{soln}} = E_{\text{M06-2X/6-311+G(d,p)}} + \Delta G_{\text{thermal,M06-2X/6-31G(d)}} + G_{\text{M06-2X/6-31G(d),toluene}} - E_{\text{M06-2X/6-31G(d)}}$ . The reaction free energy profiles below were calculated from the relative values of  $G_{\text{soln}}$  for the various species.

Kinetic simulations were performed using the software program *KinTec Explorer* (<https://kintekcorp.com>).

Figure 17 shows the reaction profile of aldehyde **14**. The calculated transition structure of a thermal Claisen rearrangement in a chair-like conformation is located at 139.8 kJ/mol above the energy of the vinyl ether **17**. This activation barrier is inconsistent with the experimental reaction temperature of 60 °C, but we cannot discount the possibility of hydrogen bonding or transition metal catalysis under the reaction conditions.

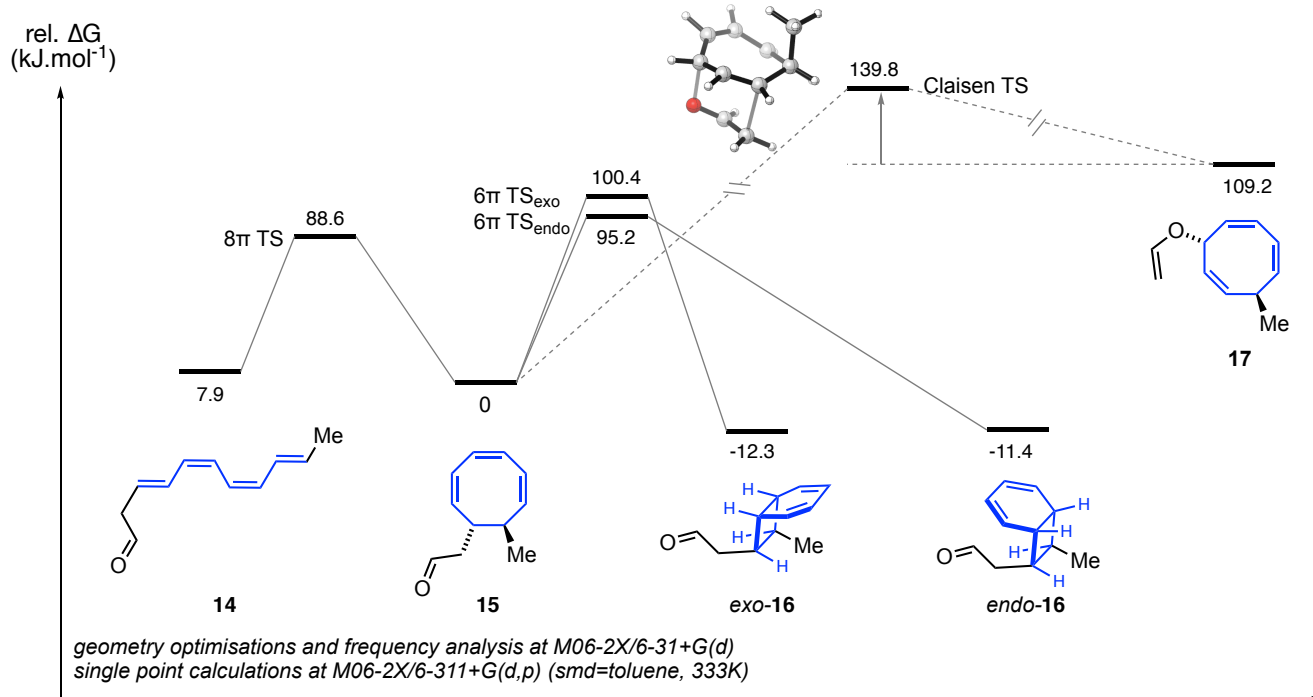

Figure 17. Computational analysis of the 8π/6π-Claisen rearrangement sequence of vinyl ether 17.

Figure 18 shows a kinetic simulation starting from a population one one antipode of *endo-16* at 60 °C. Racemisation is predicted within hours, and equilibration between diastereoisomers within ~1.5 days.

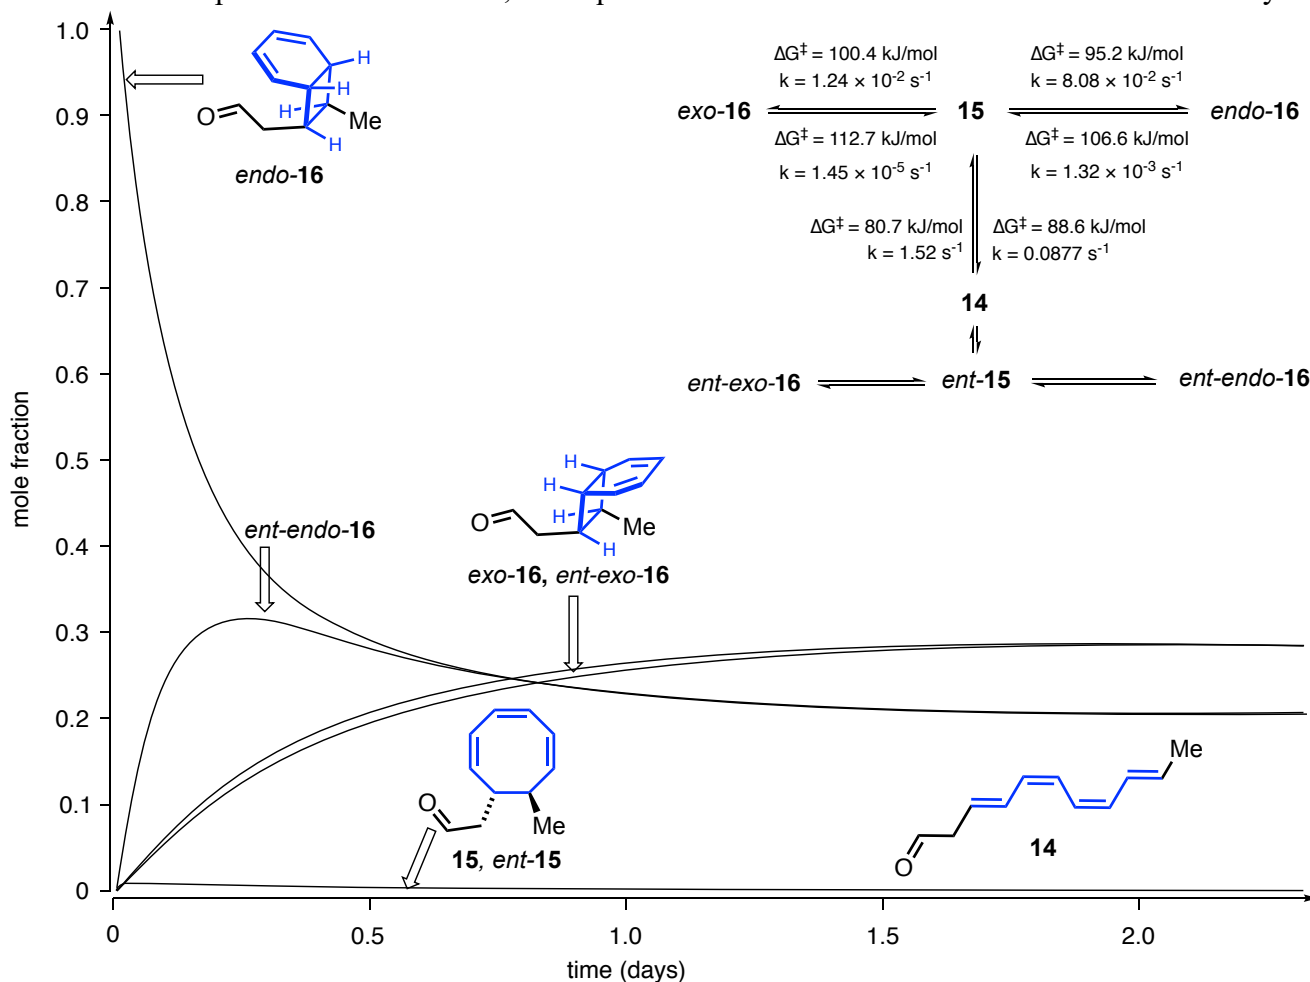
 Figure 18. Kinetic simulation from aldehyde *endo-16* at 333 K.



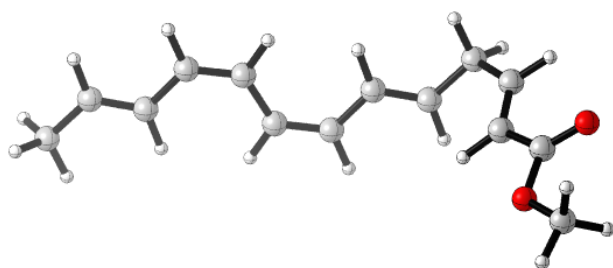

*tetraene 10*

M06-2X/6-311+G(d,p) smd toluene

Energy (0K, vacuum) = -694.581874

Gibbs free energy (393K) = -694.381651

|   |             |             |             |
|---|-------------|-------------|-------------|
| C | -1.26637300 | -0.72122600 | 1.10092100  |
| H | -0.96692100 | -0.55518700 | 2.13449700  |
| C | -2.51256200 | -0.35306900 | 0.73692700  |
| H | -3.14129100 | 0.08875000  | 1.50533400  |
| C | -3.09164800 | -0.49221900 | -0.58682800 |
| H | -2.46512600 | -0.93224200 | -1.35790000 |
| C | -0.25385900 | -1.32855500 | 0.25080700  |
| H | -0.50036300 | -1.52012400 | -0.79217000 |
| C | -4.33950400 | -0.12253000 | -0.94398400 |
| H | -4.64088200 | -0.28732900 | -1.97747100 |
| C | -5.35256000 | 0.48378700  | -0.09428300 |
| H | -5.11013800 | 0.67499000  | 0.94957800  |
| C | 0.96493700  | -1.66473800 | 0.69255500  |
| H | 1.22408500  | -1.46925300 | 1.73407200  |
| C | -6.57058500 | 0.81733900  | -0.54100900 |
| H | -6.81164400 | 0.62506400  | -1.58719400 |
| C | -7.64542900 | 1.44254200  | 0.29161600  |
| H | -7.31077400 | 1.59515900  | 1.32123400  |
| H | -8.54358300 | 0.81460700  | 0.31232300  |
| H | -7.94732800 | 2.41319500  | -0.11838600 |
| C | 2.03248300  | -2.29592200 | -0.14896500 |
| H | 1.63824400  | -2.52785800 | -1.14788300 |
| H | 2.32631500  | -3.26303200 | 0.28383800  |
| C | 3.27579200  | -1.46336300 | -0.30533100 |
| H | 4.14412300  | -1.94708800 | -0.75111200 |
| C | 3.39769800  | -0.18374200 | 0.04793100  |
| H | 2.58470200  | 0.38514800  | 0.48773700  |
| C | 4.68495200  | 0.51618200  | -0.17263800 |
| O | 5.68280700  | 0.02919400  | -0.65138300 |
| O | 4.61438900  | 1.79710200  | 0.23452100  |
| C | 5.81363100  | 2.54532100  | 0.05498200  |
| H | 5.59905000  | 3.54598400  | 0.42695600  |
| H | 6.08850000  | 2.57750600  | -1.00175500 |
| H | 6.63362500  | 2.09250400  | 0.61700200  |



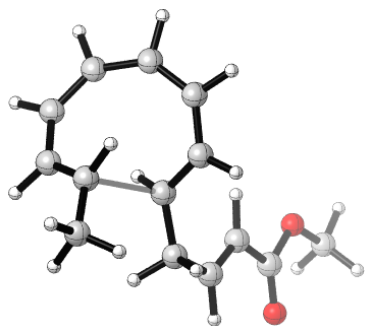

*tetraene 10 8pi-TS*

M06-2X/6-311+G(d,p) smd toluene

Energy (0K, vacuum) = -694.55896

Gibbs free energy (393K) = -694.34883

imaginary frequency: -348.05

|   |             |             |             |
|---|-------------|-------------|-------------|
| C | -3.16987200 | 0.95789500  | -1.56686200 |
| H | -3.43018300 | 1.20959200  | -2.59333800 |
| C | -2.91322400 | 2.06190500  | -0.76199500 |
| H | -3.18169200 | 2.99624100  | -1.25450900 |
| C | -2.43170100 | 2.30370700  | 0.55228700  |
| H | -2.64911600 | 3.32537200  | 0.86322500  |
| C | -1.72520400 | 1.60432200  | 1.52393600  |
| H | -1.65147700 | 2.12129300  | 2.47877600  |
| C | -3.16997700 | -0.41722400 | -1.27493300 |
| H | -3.20195700 | -1.10301500 | -2.12187000 |
| C | -3.06020100 | -0.95077400 | -0.00781300 |
| H | -3.30750700 | -0.29615600 | 0.82023600  |
| C | -1.07601200 | 0.35818600  | 1.46909900  |
| H | -0.76024600 | -0.07979200 | 2.41655500  |
| C | -0.88356200 | -0.37322700 | 0.31613900  |
| H | -0.91993100 | 0.16724300  | -0.62339300 |
| C | -3.18055500 | -2.42523900 | 0.25204700  |
| H | -2.58410200 | -2.73296100 | 1.11651700  |
| H | -2.86280400 | -3.01170300 | -0.61567900 |
| H | -4.22258900 | -2.68789900 | 0.47054900  |
| C | -0.08105000 | -1.64420000 | 0.30948700  |
| H | -0.21405900 | -2.18209300 | 1.25937300  |
| H | -0.45126700 | -2.32319900 | -0.47031800 |
| C | 1.39409400  | -1.44048500 | 0.08774800  |
| H | 1.99351200  | -2.33609800 | -0.07312000 |
| C | 2.02819300  | -0.26784900 | 0.07680900  |
| H | 1.52201300  | 0.67903900  | 0.23504800  |
| C | 3.49244200  | -0.23594500 | -0.15060700 |
| O | 4.20127400  | -1.19760300 | -0.33829200 |
| O | 3.95842200  | 1.02622800  | -0.12333700 |
| C | 5.36224600  | 1.14675800  | -0.33468500 |
| H | 5.63689400  | 0.74344300  | -1.31203900 |
| H | 5.91234900  | 0.60246300  | 0.43634300  |
| H | 5.58089800  | 2.21225500  | -0.28326600 |

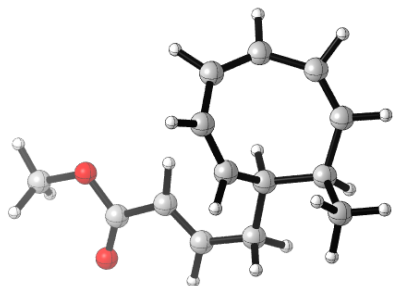

*cyclooctatriene 11*

M06-2X/6-311+G(d,p) smd toluene

Energy (0K, vacuum) = -694.597663

Gibbs free energy (393K) = -694.383209

|   |             |             |             |
|---|-------------|-------------|-------------|
| C | 3.52806600  | 0.16455800  | -0.78005100 |
| H | 4.53899000  | -0.12860800 | -1.06826900 |
| C | 3.29169600  | 1.48414500  | -0.83483300 |
| H | 4.13635500  | 2.07436900  | -1.19229200 |
| C | 2.12851800  | 2.34055800  | -0.55342500 |
| H | 2.07394300  | 3.21019000  | -1.20766400 |
| C | 1.24728600  | 2.30950900  | 0.46134800  |
| H | 0.56871400  | 3.15666200  | 0.55445600  |
| C | 1.12424700  | 1.27631600  | 1.48843900  |
| H | 0.96574700  | 1.61987400  | 2.50940000  |
| C | 1.11443700  | -0.03792100 | 1.24144600  |
| H | 0.99102100  | -0.72353300 | 2.08047500  |
| C | 1.20631400  | -0.66977300 | -0.12231500 |
| H | 0.86969300  | 0.05835000  | -0.87136000 |
| C | 2.66090500  | -1.02866700 | -0.47939100 |
| H | 2.63421100  | -1.61772200 | -1.41132300 |
| C | 0.29445600  | -1.89966500 | -0.21037600 |
| H | 0.52226500  | -2.60055500 | 0.60566300  |
| H | 0.51113100  | -2.45512000 | -1.13455200 |
| C | -1.17805600 | -1.61826100 | -0.18058300 |
| H | -1.83928900 | -2.48441900 | -0.20465500 |
| C | 3.33732400  | -1.90654500 | 0.58373200  |
| H | 2.78075400  | -2.83373700 | 0.75275600  |
| H | 3.41471700  | -1.36682000 | 1.53223000  |
| H | 4.34965400  | -2.18049200 | 0.27079400  |
| C | -1.76029300 | -0.41843000 | -0.14272300 |
| H | -1.20859700 | 0.51510400  | -0.10595800 |
| C | -3.23952200 | -0.33126800 | -0.13942100 |
| O | -4.00645700 | -1.26607300 | -0.16134200 |
| O | -3.64788100 | 0.95170900  | -0.10872000 |
| C | -5.06178200 | 1.12517200  | -0.10487400 |
| H | -5.50294200 | 0.68586000  | -1.00252100 |
| H | -5.23027800 | 2.20079400  | -0.08089200 |
| H | -5.50295200 | 0.64636100  | 0.77236100  |

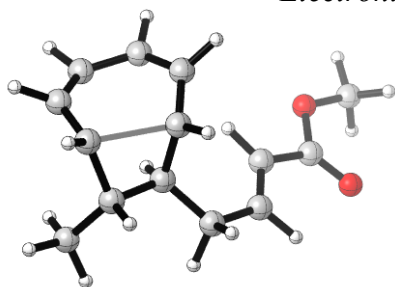

*cyclooctatriene 11 6pi-exo-TS*

M06-2X/6-311+G(d,p) smd toluene

Energy (0K, vacuum) = -694.559128

Gibbs free energy (393K) = -694.345014

imaginary frequency: -578.11

|   |             |             |             |
|---|-------------|-------------|-------------|
| C | -1.33497900 | 0.20928700  | 1.25217300  |
| H | -1.28733000 | -0.26186300 | 2.23635700  |
| C | -0.84582000 | 1.51281100  | 1.13515100  |
| H | -0.33712400 | 1.98292400  | 1.97487100  |
| C | -1.12957200 | 2.27993100  | 0.01257900  |
| H | -0.58041300 | 3.20325200  | -0.15533600 |
| C | -2.31858600 | 2.11333000  | -0.71987700 |
| H | -2.55288800 | 2.89968400  | -1.43404300 |
| C | -3.37901300 | 1.30447200  | -0.31043400 |
| H | -4.36399300 | 1.74392600  | -0.47920800 |
| C | -3.34837700 | 0.13544900  | 0.47415700  |
| H | -4.26745500 | -0.01825800 | 1.04781600  |
| C | -2.69934700 | -1.17322900 | 0.02069800  |
| H | -2.88771400 | -1.91604600 | 0.80910500  |
| C | -1.23962900 | -0.77767500 | 0.09319700  |
| H | -0.96561200 | -0.23101400 | -0.81780800 |
| C | -0.27329300 | -1.93656000 | 0.31683600  |
| H | -0.47556400 | -2.71777900 | -0.43237200 |
| H | -0.49538700 | -2.40948100 | 1.28542900  |
| C | 1.19138600  | -1.62266900 | 0.26550800  |
| H | 1.87261300  | -2.44247600 | 0.49338400  |
| C | -3.21947600 | -1.70633700 | -1.30859500 |
| H | -2.73453800 | -2.65269300 | -1.57315200 |
| H | -3.02427200 | -0.97989200 | -2.10437300 |
| H | -4.29955100 | -1.88200000 | -1.26860300 |
| C | 1.74468500  | -0.44974500 | -0.04657900 |
| H | 1.16917000  | 0.43940700  | -0.28155900 |
| C | 3.22132600  | -0.32946300 | -0.06842500 |
| O | 3.59990200  | 0.91702900  | -0.41115800 |
| O | 4.01053400  | -1.21104900 | 0.18204500  |
| C | 5.00926600  | 1.11779100  | -0.45814500 |
| H | 5.46653600  | 0.44740600  | -1.18952000 |
| H | 5.45554300  | 0.92499500  | 0.52019400  |
| H | 5.15306100  | 2.15771600  | -0.74773900 |

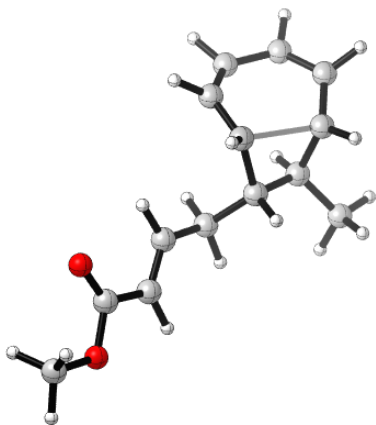

*cyclooctatriene 11 6pi-endo-TS*

M06-2X/6-311+G(d,p) smd toluene

Energy (0K, vacuum) = -694.559041

Gibbs free energy (393K) = -694.346533

imaginary frequency: -572.51

|   |             |             |             |
|---|-------------|-------------|-------------|
| C | -3.15335400 | 0.50354900  | 0.96537600  |
| H | -3.15249100 | 1.02827300  | 1.92310400  |
| C | -4.27867600 | -0.25760400 | 0.64033500  |
| H | -5.16097200 | -0.23266900 | 1.27741900  |
| C | -4.23461500 | -1.18190200 | -0.39601300 |
| H | -5.16185100 | -1.61576500 | -0.76263500 |
| C | -3.04840500 | -1.84826000 | -0.75106200 |
| H | -3.16317400 | -2.70929200 | -1.40585900 |
| C | -1.86332600 | -1.77469700 | -0.01678200 |
| H | -1.34445700 | -2.72978900 | 0.08779100  |
| C | -1.38251700 | -0.71683900 | 0.77849700  |
| H | -0.74059200 | -1.05311800 | 1.59774100  |
| C | -0.98560600 | 0.65015200  | 0.21803500  |
| H | -0.56595100 | 1.23735400  | 1.04684000  |
| C | -2.35140900 | 1.20297400  | -0.12556400 |
| H | -2.66961400 | 0.80097700  | -1.09485100 |
| C | 0.04134500  | 0.60627800  | -0.92357300 |
| H | 0.23511700  | 1.62553900  | -1.28009000 |
| H | -0.40942600 | 0.03856500  | -1.74960100 |
| C | -2.49539700 | 2.71910700  | -0.12341300 |
| H | -3.53031300 | 3.01588600  | -0.31929500 |
| H | -1.86129400 | 3.17588700  | -0.89105700 |
| H | -2.20090100 | 3.13328000  | 0.84776900  |
| C | 1.32165700  | -0.04903400 | -0.51529700 |
| H | 1.27589800  | -1.09782200 | -0.22030900 |
| C | 2.50996600  | 0.55422800  | -0.46067000 |
| H | 2.65241200  | 1.59495400  | -0.73654600 |
| C | 3.70346800  | -0.20097400 | -0.01510000 |
| O | 4.80420300  | 0.57448400  | -0.03842800 |
| O | 3.71959500  | -1.35973000 | 0.33015000  |
| C | 6.00030000  | -0.07880500 | 0.37690500  |
| H | 6.21466000  | -0.93107700 | -0.27196400 |
| H | 5.90281600  | -0.43651600 | 1.40447500  |
| H | 6.78915500  | 0.66826800  | 0.30325400  |

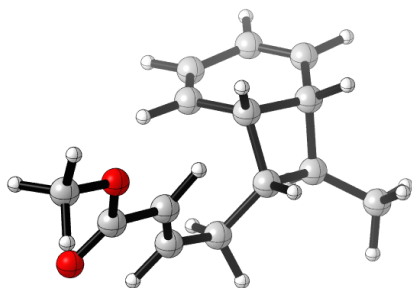*bicyclo[4.2.0]octadiene 12-endo*

M06-2X/6-311+G(d,p) smd toluene

Energy (0K, vacuum) = -694.603461

Gibbs free energy (393K) = -694.388117

|   |             |             |             |
|---|-------------|-------------|-------------|
| C | 1.20197000  | -1.51340800 | 0.48293300  |
| H | 0.23909800  | -1.75207600 | 0.93231600  |
| C | 2.30937300  | -2.15894200 | 0.86945500  |
| H | 2.25193500  | -2.91792700 | 1.64490500  |
| C | 3.61466300  | -1.91617200 | 0.23625200  |
| H | 4.44150200  | -2.56881300 | 0.50150300  |
| C | 3.77830100  | -0.93596600 | -0.65941400 |
| H | 4.73998100  | -0.77567700 | -1.14057000 |
| C | 1.21119200  | -0.47408400 | -0.60170600 |
| H | 0.57671100  | -0.80919600 | -1.43248500 |
| C | 2.64735700  | -0.00661200 | -0.97742200 |
| H | 2.68591200  | 0.32978800  | -2.02004000 |
| C | 0.92355100  | 0.97642200  | -0.10640700 |
| H | 0.48785500  | 1.56389200  | -0.92609600 |
| C | 2.45002500  | 1.22082000  | -0.04344700 |
| H | 2.81432000  | 0.95872000  | 0.95850700  |
| C | 2.99254300  | 2.56966600  | -0.47521300 |
| H | 2.64490400  | 2.81944400  | -1.48405800 |
| H | 4.08742700  | 2.57307800  | -0.48445700 |
| H | 2.66162000  | 3.36558900  | 0.20108100  |
| C | 0.13465100  | 1.19820600  | 1.17205400  |
| H | 0.22928700  | 2.24946700  | 1.48219500  |
| H | 0.59249200  | 0.61346100  | 1.98395700  |
| C | -1.32080400 | 0.85035300  | 1.10963800  |
| H | -1.90685200 | 1.00047100  | 2.01627200  |
| C | -1.96581900 | 0.36670000  | 0.04591900  |
| H | -1.48297800 | 0.17884800  | -0.90761500 |
| C | -3.41344400 | 0.06571000  | 0.14085100  |
| O | -4.10483000 | 0.21258100  | 1.12177300  |
| O | -3.88637200 | -0.40572000 | -1.02828300 |
| C | -5.27579100 | -0.72185900 | -1.02342500 |
| H | -5.48988900 | -1.48894200 | -0.27577100 |
| H | -5.50198300 | -1.08666100 | -2.02418500 |
| H | -5.86834900 | 0.16663700  | -0.79379000 |

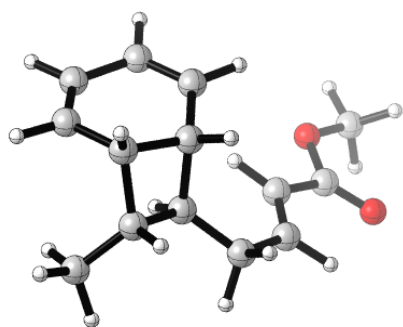

*bicyclo[4.2.0]octadiene 12-exo*

M06-2X/6-311+G(d,p) smd toluene

Energy (0K, vacuum) = -694.602865

Gibbs free energy (393K) = -694.387143

|   |             |             |             |
|---|-------------|-------------|-------------|
| C | 0.75940200  | 1.49822100  | -0.96373500 |
| H | -0.16627300 | 1.64788000  | -1.51372600 |
| C | 1.24480100  | 2.45354800  | -0.16182600 |
| H | 0.71874200  | 3.39620600  | -0.04123300 |
| C | 2.51998100  | 2.27389000  | 0.54741900  |
| H | 2.82669300  | 3.04348400  | 1.25042000  |
| C | 3.32276800  | 1.23016500  | 0.30461500  |
| H | 4.28877800  | 1.15852200  | 0.80130000  |
| C | 1.46664000  | 0.18199400  | -1.08234700 |
| C | 2.96929900  | 0.14642400  | -0.67393000 |
| C | 1.19750800  | -0.90403200 | 0.00197500  |
| H | 0.95297700  | -0.41284800 | 0.95324000  |
| C | 2.70589900  | -1.24328500 | -0.02309400 |
| H | 2.88456900  | -2.02226600 | -0.77646700 |
| C | 3.38147900  | -1.61558400 | 1.28383500  |
| H | 3.20448500  | -0.84601300 | 2.04263100  |
| H | 4.46400100  | -1.72751500 | 1.16038600  |
| H | 2.98942300  | -2.56461200 | 1.66523700  |
| C | 0.22528600  | -2.03187800 | -0.29036100 |
| H | 0.39150100  | -2.85250400 | 0.42516000  |
| H | 0.45778200  | -2.46290000 | -1.27569700 |
| C | -1.23114700 | -1.67870600 | -0.26105200 |
| H | -1.93282000 | -2.46086700 | -0.55060000 |
| C | -1.75165800 | -0.50291800 | 0.09499100  |
| H | -1.15203400 | 0.34831900  | 0.40147100  |
| C | -3.22235300 | -0.32280600 | 0.07458200  |
| O | -4.03648800 | -1.16077900 | -0.23736400 |
| O | -3.56128300 | 0.92429500  | 0.45368100  |
| C | -4.96230100 | 1.18236200  | 0.46340600  |
| H | -5.38306300 | 1.04447000  | -0.53527800 |
| H | -5.07292900 | 2.21602300  | 0.78776600  |
| H | -5.47032200 | 0.50529200  | 1.15394900  |
| H | 1.32382600  | -0.25826700 | -2.07607000 |
| H | 3.70321500  | 0.13509000  | -1.48989200 |

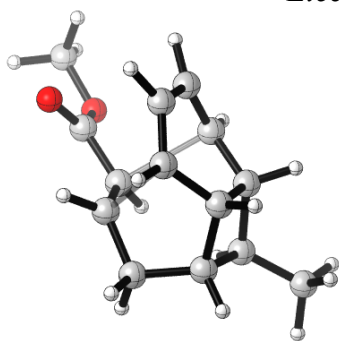

*bicyclo[4.2.0]octadiene 12-endo IMDA TS*

M06-2X/6-311+G(d,p) smd toluene

Energy (0K, vacuum) = -694.567091

Gibbs free energy (393K) = -694.343315

imaginary frequency: -478.95

|   |             |             |             |
|---|-------------|-------------|-------------|
| C | 0.77474600  | 1.88408400  | -0.38261800 |
| H | 0.99826900  | 2.84041000  | 0.08813300  |
| C | -0.27266600 | 1.81211800  | -1.28706700 |
| H | -0.93195800 | 2.66274800  | -1.42966300 |
| C | -0.66344500 | 0.55284600  | -1.77883500 |
| H | -1.62095700 | 0.45356000  | -2.28254600 |
| C | -0.00036100 | -0.56802100 | -1.31807800 |
| H | -0.40256600 | -1.55754600 | -1.52881600 |
| C | 1.92040100  | 0.91218200  | -0.51095600 |
| H | 2.73414700  | 1.36951500  | -1.08259500 |
| C | 1.48817200  | -0.46738000 | -1.07236900 |
| H | 1.97459300  | -0.72470300 | -2.02314800 |
| C | 2.38139400  | 0.23137800  | 0.80627800  |
| H | 3.41860800  | 0.41186600  | 1.11022200  |
| C | 2.17655300  | -1.16016200 | 0.13522900  |
| H | 1.55402900  | -1.86051900 | 0.70073900  |
| C | 3.48819100  | -1.83700200 | -0.23782800 |
| H | 4.13178100  | -1.14995100 | -0.80031700 |
| H | 3.31498900  | -2.71957600 | -0.86236000 |
| H | 4.03642900  | -2.15164200 | 0.65616700  |
| C | 1.40754400  | 0.60785900  | 1.92553300  |
| H | 1.73307400  | 1.54856700  | 2.38191100  |
| H | 1.41567100  | -0.15373300 | 2.71560400  |
| C | 0.01966300  | 0.78069200  | 1.35183200  |
| H | -0.57097500 | 1.64502500  | 1.63702000  |
| C | -0.68513500 | -0.31727300 | 0.88082300  |
| H | -0.35249000 | -1.33555700 | 1.03465700  |
| C | -2.10360800 | -0.12744000 | 0.56372100  |
| O | -2.66275500 | 0.94724100  | 0.50285600  |
| O | -2.72910300 | -1.29374700 | 0.28489100  |
| C | -4.09532000 | -1.15604700 | -0.08727900 |
| H | -4.46129900 | -2.16685500 | -0.26358500 |
| H | -4.18709400 | -0.55194900 | -0.99390000 |
| H | -4.66614900 | -0.67462200 | 0.71019400  |

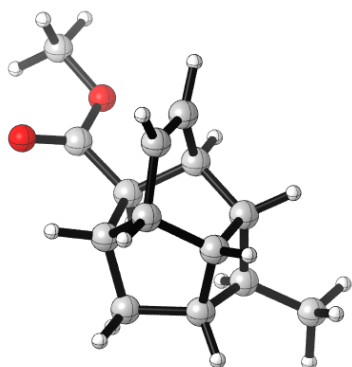

*IMDA product 13*

M06-2X/6-311+G(d,p) smd toluene

Energy (0K, vacuum) = -694.646924

Gibbs free energy (393K) = -694.417819

|   |             |             |             |
|---|-------------|-------------|-------------|
| C | 1.91165300  | -0.73632000 | 0.69906500  |
| H | 2.64950300  | -1.05897900 | 1.43580000  |
| C | 1.43854300  | 0.73777000  | 0.82872000  |
| H | 1.77978300  | 1.26889600  | 1.72372400  |
| C | 2.41270700  | -0.42475400 | -0.74206400 |
| H | 3.43469700  | -0.71462800 | -1.00510100 |
| C | 2.22563900  | 1.08927700  | -0.46210600 |
| H | 1.66297800  | 1.64146000  | -1.22557100 |
| C | 3.53713200  | 1.80540500  | -0.17338400 |
| H | 4.11521000  | 1.25944600  | 0.58174800  |
| H | 3.35999800  | 2.81642600  | 0.20813000  |
| H | 4.15320500  | 1.88160000  | -1.07535100 |
| C | 1.35913900  | -1.07172800 | -1.65030100 |
| H | 1.69631200  | -2.07319600 | -1.94210100 |
| H | 1.17960500  | -0.50354000 | -2.57041900 |
| C | -2.10691700 | 0.01305000  | -0.56070900 |
| O | -2.73062500 | -0.96472500 | -0.89089100 |
| O | -2.70262900 | 1.15106400  | -0.15461900 |
| C | -4.12717200 | 1.10166900  | -0.12511500 |
| H | -4.45225600 | 2.08263600  | 0.21851200  |
| H | -4.46578700 | 0.32119800  | 0.55996600  |
| H | -4.52328500 | 0.89152300  | -1.12107200 |
| C | 0.10071400  | -1.20239900 | -0.77716400 |
| H | -0.61732400 | -1.91769500 | -1.18289500 |
| C | -0.59522700 | 0.15747300  | -0.56806000 |
| H | -0.36590500 | 0.83464000  | -1.40085200 |
| C | -0.10648900 | 0.79058300  | 0.76818600  |
| H | -0.47352600 | 1.81517400  | 0.85573600  |
| C | 0.68116200  | -1.66827300 | 0.59515100  |
| H | 0.97955200  | -2.71938900 | 0.54009800  |
| C | -0.24408800 | -1.38476300 | 1.74823900  |
| H | -0.54468000 | -2.16693000 | 2.43837600  |
| C | -0.62495700 | -0.10921000 | 1.86510900  |
| H | -1.27309000 | 0.26396300  | 2.65195900  |



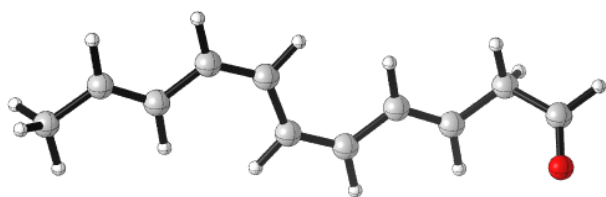

*tetraene 14*

M06-2X/6-311+G(d,p) smd toluene

Energy (0K, vacuum) = -502.648737

Gibbs free energy (393K) = -502.492141

|   |             |             |             |
|---|-------------|-------------|-------------|
| C | 0.59773100  | -0.83334900 | -0.42156600 |
| H | 0.90186600  | -1.85632200 | -0.63617200 |
| C | -0.71987800 | -0.58236100 | -0.27353800 |
| H | -1.39800000 | -1.42495600 | -0.37868700 |
| C | -1.31606700 | 0.70976500  | 0.01298600  |
| H | -0.64055400 | 1.55453500  | 0.11744800  |
| C | 1.68460800  | 0.12861600  | -0.32351300 |
| H | 1.43844800  | 1.16487500  | -0.09727900 |
| C | -2.63493100 | 0.95479500  | 0.16119300  |
| H | -2.93989200 | 1.97815200  | 0.37538100  |
| C | -3.72201400 | -0.00715900 | 0.06711300  |
| H | -3.47955600 | -1.04693000 | -0.14521500 |
| C | 2.96893800  | -0.20590300 | -0.49777900 |
| H | 3.23254500  | -1.24099000 | -0.70771100 |
| C | -5.00787100 | 0.33069600  | 0.23074100  |
| H | -5.24898900 | 1.37286100  | 0.44381300  |
| C | -6.15979400 | -0.62074900 | 0.14459800  |
| H | -5.81913300 | -1.63666900 | -0.07280600 |
| H | -6.86272600 | -0.31930100 | -0.64054900 |
| H | -6.72460100 | -0.64219000 | 1.08373800  |
| C | 4.10725100  | 0.76083300  | -0.41452800 |
| H | 3.78896900  | 1.72976100  | -0.00887100 |
| H | 4.52008900  | 0.98139400  | -1.41288500 |
| C | 5.26986500  | 0.24928800  | 0.41021400  |
| H | 6.09584700  | 0.97658500  | 0.55859500  |
| O | 5.34108300  | -0.86220500 | 0.86821000  |

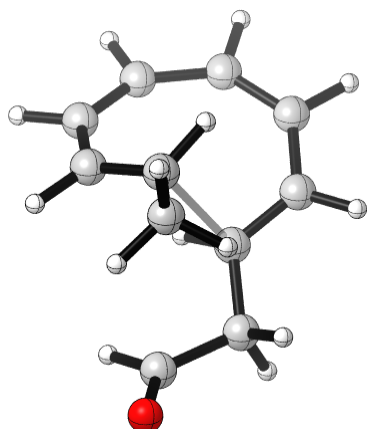

*tetraene 14 8pi-TS*

*Electronic Supplementary Information for Chemical Science*

M06-2X/6-311+G(d,p) smd toluene

Energy (0K, vacuum) = -502.626711

Gibbs free energy (393K) = -502.461417

imaginary frequency: -348.05

|   |             |             |             |
|---|-------------|-------------|-------------|
| C | -3.16987200 | 0.95789500  | -1.56686200 |
| H | -3.43018300 | 1.20959200  | -2.59333800 |
| C | -2.91322400 | 2.06190500  | -0.76199500 |
| H | -3.18169200 | 2.99624100  | -1.25450900 |
| C | -2.43170100 | 2.30370700  | 0.55228700  |
| H | -2.64911600 | 3.32537200  | 0.86322500  |
| C | -1.72520400 | 1.60432200  | 1.52393600  |
| H | -1.65147700 | 2.12129300  | 2.47877600  |
| C | -3.16997700 | -0.41722400 | -1.27493300 |
| H | -3.20195700 | -1.10301500 | -2.12187000 |
| C | -3.06020100 | -0.95077400 | -0.00781300 |
| H | -3.30750700 | -0.29615600 | 0.82023600  |
| C | -1.07601200 | 0.35818600  | 1.46909900  |
| H | -0.76024600 | -0.07979200 | 2.41655500  |
| C | -0.88356200 | -0.37322700 | 0.31613900  |
| H | -0.91993100 | 0.16724300  | -0.62339300 |
| C | -3.18055500 | -2.42523900 | 0.25204700  |
| H | -2.58410200 | -2.73296100 | 1.11651700  |
| H | -2.86280400 | -3.01170300 | -0.61567900 |
| H | -4.22258900 | -2.68789900 | 0.47054900  |
| C | -0.08105000 | -1.64420000 | 0.30948700  |
| H | -0.21405900 | -2.18209300 | 1.25937300  |
| H | -0.45126700 | -2.32319900 | -0.47031800 |
| C | 1.39409400  | -1.44048500 | 0.08774800  |
| H | 1.99351200  | -2.33609800 | -0.07312000 |
| C | 2.02819300  | -0.26784900 | 0.07680900  |
| H | 1.52201300  | 0.67903900  | 0.23504800  |
| C | 3.49244200  | -0.23594500 | -0.15060700 |
| O | 4.20127400  | -1.19760300 | -0.33829200 |
| O | 3.95842200  | 1.02622800  | -0.12333700 |
| C | 5.36224600  | 1.14675800  | -0.33468500 |
| H | 5.63689400  | 0.74344300  | -1.31203900 |
| H | 5.91234900  | 0.60246300  | 0.43634300  |
| H | 5.58089800  | 2.21225500  | -0.28326600 |

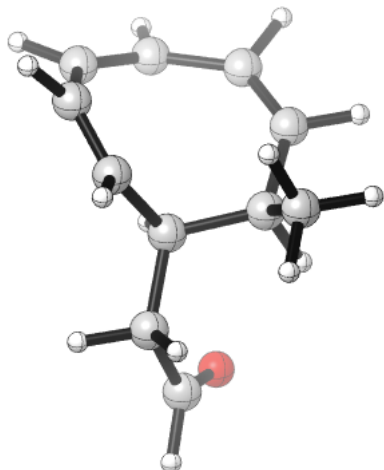

*cyclooctatriene 15*

M06-2X/6-311+G(d,p) smd toluene

Energy (0K, vacuum) = -502.664644

Gibbs free energy (393K) = -502.495162

|   |               |               |               |
|---|---------------|---------------|---------------|
| C | -0.8102020000 | 1.7048200000  | -0.4296120000 |
| H | -0.7845080000 | 2.7937720000  | -0.4957570000 |
| C | -1.8948000000 | 1.1384700000  | -0.9802260000 |
| H | -2.5797850000 | 1.8481690000  | -1.4455320000 |
| C | -2.3732800000 | -0.2430470000 | -1.1477430000 |
| H | -2.9346820000 | -0.3840910000 | -2.0709350000 |
| C | -2.3687730000 | -1.2867170000 | -0.3005530000 |
| H | -2.9355230000 | -2.1674490000 | -0.5997660000 |
| C | -1.7208160000 | -1.3606050000 | 1.0078330000  |
| H | -2.2915570000 | -1.8317940000 | 1.8068280000  |
| C | -0.4740470000 | -0.9500420000 | 1.2627690000  |
| H | -0.0894790000 | -1.0562080000 | 2.2778870000  |
| C | 0.4760510000  | -0.3891580000 | 0.2404460000  |
| H | 0.1733330000  | -0.7352910000 | -0.7542890000 |
| C | 0.4338940000  | 1.1513060000  | 0.2106760000  |
| H | 1.2689230000  | 1.4932900000  | -0.4178450000 |
| C | 1.8901270000  | -0.9183570000 | 0.4985790000  |
| H | 1.8656050000  | -2.0015620000 | 0.6892280000  |
| H | 2.3405520000  | -0.4819100000 | 1.4014950000  |
| C | 2.8484810000  | -0.7096710000 | -0.6483970000 |
| H | 3.8857010000  | -1.0629750000 | -0.4651060000 |
| O | 2.5525000000  | -0.2191960000 | -1.7097510000 |
| C | 0.6107190000  | 1.7797760000  | 1.6013060000  |
| H | 1.5418980000  | 1.4574060000  | 2.0791340000  |
| H | -0.2254240000 | 1.5101850000  | 2.2533320000  |
| H | 0.6408210000  | 2.8713780000  | 1.5288700000  |

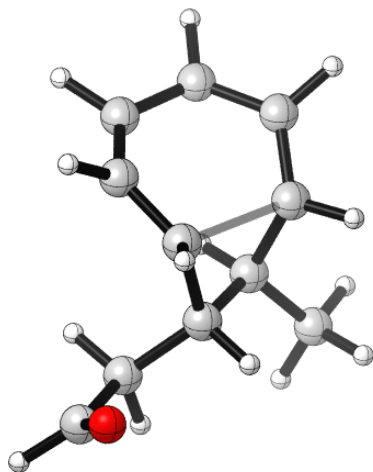

*bicyclo[4.2.0]octadiene 15-endo*

M06-2X/6-311+G(d,p) smd toluene

Energy (0K, vacuum) = -502.627819

Gibbs free energy (393K) = -502.45891

imaginary frequency: -574.49

|   |             |             |             |
|---|-------------|-------------|-------------|
| C | -1.42753200 | 0.69328700  | 0.85223600  |
| H | -1.39313600 | 1.26718900  | 1.78069400  |
| C | -2.63010100 | 0.06652300  | 0.51708800  |
| H | -3.52448700 | 0.23933500  | 1.11313100  |
| C | -2.66807400 | -0.91264700 | -0.46780200 |
| H | -3.62932000 | -1.24597000 | -0.85172900 |
| C | -1.56475300 | -1.74289600 | -0.73465400 |
| H | -1.76646700 | -2.61959200 | -1.34663300 |
| C | -0.40634000 | -1.77735300 | 0.04409900  |
| H | -0.01962100 | -2.78309500 | 0.22085000  |
| C | 0.18052200  | -0.74831400 | 0.80481800  |
| H | 0.75146700  | -1.11079600 | 1.66156900  |
| C | 0.76738400  | 0.52600200  | 0.19513500  |
| H | 1.22798900  | 1.09589700  | 1.01259900  |
| C | -0.50302400 | 1.22360200  | -0.23734900 |
| H | -0.83658800 | 0.81140800  | -1.19710700 |
| C | 1.81671900  | 0.28524800  | -0.88266900 |
| H | 2.11996700  | 1.23038300  | -1.35919400 |
| H | 1.40199600  | -0.34000700 | -1.68660500 |
| C | -0.45252400 | 2.74368000  | -0.31978300 |
| H | -1.43245600 | 3.15642000  | -0.57835000 |
| H | 0.26436900  | 3.07425800  | -1.07981100 |
| H | -0.14562200 | 3.17201000  | 0.64128100  |
| C | 3.06629700  | -0.38078000 | -0.36540000 |
| H | 3.83584000  | -0.62010600 | -1.12964700 |
| O | 3.25932900  | -0.64818100 | 0.79557900  |

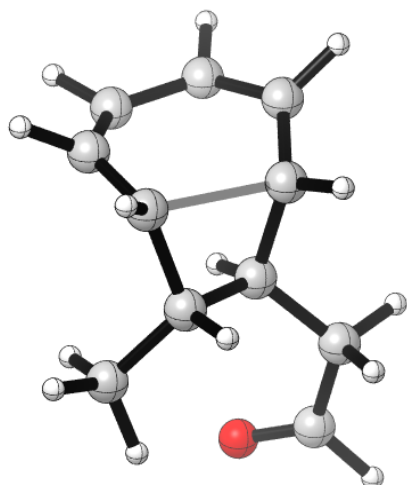

*bicyclo[4.2.0]octadiene 15-exo*

M06-2X/6-311+G(d,p) smd toluene

Energy (0K, vacuum) = -502.625871

Gibbs free energy (393K) = -502.456922

imaginary frequency: -574.83

|   |             |             |             |
|---|-------------|-------------|-------------|
| C | -0.73602200 | -0.93321800 | -1.02551200 |
| H | -0.54019200 | -1.19626100 | -2.06747300 |
| C | -1.70409000 | -1.66960500 | -0.33863500 |
| H | -2.16644000 | -2.53878300 | -0.80326100 |
| C | -2.21858300 | -1.20594800 | 0.86572400  |
| H | -2.81870300 | -1.87107200 | 1.48197600  |
| C | -2.29890100 | 0.16599600  | 1.15923500  |
| H | -2.91290900 | 0.43537400  | 2.01572700  |
| C | -2.03320300 | 1.18145200  | 0.23892900  |
| H | -2.73008400 | 2.02005100  | 0.29300400  |
| C | -1.16295200 | 1.17465700  | -0.86776300 |
| H | -1.48859100 | 1.84535000  | -1.66919500 |
| C | 0.35994700  | 1.06955500  | -0.76232100 |
| H | 0.75253200  | 1.11688000  | -1.78888600 |
| C | 0.47065000  | -0.36679800 | -0.28940400 |
| H | 0.28725200  | -0.41159800 | 0.78913700  |
| C | 1.76127200  | -1.11374100 | -0.60150100 |
| H | 2.08981400  | -0.93437900 | -1.63614400 |
| H | 1.60518200  | -2.20109000 | -0.52945700 |
| C | 2.90630600  | -0.78066300 | 0.32342000  |
| H | 3.87564800  | -1.26045400 | 0.06951200  |
| O | 2.81696300  | -0.06707600 | 1.29162600  |
| C | 0.99736800  | 2.17363400  | 0.07256700  |
| H | 2.08893400  | 2.11653700  | 0.04706100  |
| H | 0.67772000  | 2.08556800  | 1.11542300  |
| H | 0.69338400  | 3.15855800  | -0.29887100 |

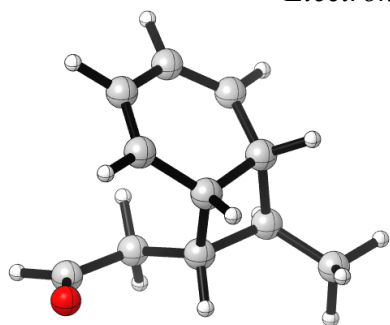

*bicyclo[4.2.0]octadiene 16-endo*

M06-2X/6-311+G(d,p) smd toluene

Energy (0K, vacuum) = -502.671214

Gibbs free energy (393K) = -502.499491

|   |             |             |             |
|---|-------------|-------------|-------------|
| C | -0.79194300 | 1.19641500  | -1.07019400 |
| H | -1.65209400 | 1.09971600  | -1.72665100 |
| C | -0.64034300 | 2.27193800  | -0.28826500 |
| H | -1.37147000 | 3.07535600  | -0.30726900 |
| C | 0.52141500  | 2.41265200  | 0.60428500  |
| H | 0.54983300  | 3.26540500  | 1.27718600  |
| C | 1.53546300  | 1.53939200  | 0.58323300  |
| H | 2.39687600  | 1.67997300  | 1.23417500  |
| C | 1.56061400  | 0.35281100  | -0.33672300 |
| H | 2.42985500  | 0.42484700  | -1.00501000 |
| C | 0.19858200  | 0.07147000  | -1.03501600 |
| H | 0.34464300  | -0.33000400 | -2.04193600 |
| C | 1.45130800  | -1.02378200 | 0.38062600  |
| H | 1.60818400  | -0.97601300 | 1.46639200  |
| C | -0.04349100 | -1.10903100 | -0.03586900 |
| H | -0.32746200 | -2.04757400 | -0.52378700 |
| C | 2.32377400  | -2.10760900 | -0.23257800 |
| H | 3.38564200  | -1.91232300 | -0.05072000 |
| H | 2.17304300  | -2.15547400 | -1.31762700 |
| H | 2.08064500  | -3.09129000 | 0.18231900  |
| C | -1.01931100 | -0.81921600 | 1.09014400  |
| H | -0.81661600 | 0.15146800  | 1.56326500  |
| H | -0.91806900 | -1.56798500 | 1.89052500  |
| C | -2.45743700 | -0.82967900 | 0.63997100  |
| H | -3.20701600 | -0.58203900 | 1.42121100  |
| O | -2.81347300 | -1.09577900 | -0.48247000 |

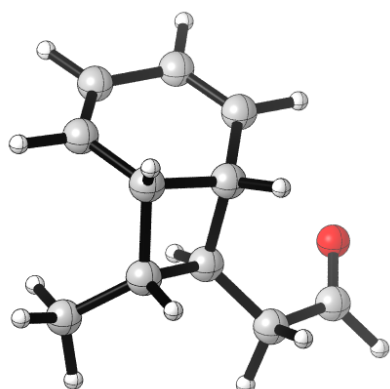

*bicyclo[4.2.0]octadiene 16-exo*

Electronic Supplementary Information for Chemical Science

M06-2X/6-311+G(d,p) smd toluene

Energy (0K, vacuum) = -502.670072

Gibbs free energy (393K) = -502.499858

|   |             |             |             |
|---|-------------|-------------|-------------|
| C | 2.37393300  | -0.03532000 | -0.02076400 |
| H | 3.22039500  | 0.62365400  | -0.20601100 |
| C | 2.33432700  | -1.25206900 | -0.57663600 |
| H | 3.14399200  | -1.57906700 | -1.22362200 |
| C | 1.24083500  | -2.19724400 | -0.30726800 |
| H | 1.33069700  | -3.20817800 | -0.69392800 |
| C | 0.16601500  | -1.83269200 | 0.39984100  |
| H | -0.64257400 | -2.53042000 | 0.59304900  |
| C | 1.30178900  | 0.46404200  | 0.90530300  |
| H | 1.73755200  | 0.66332800  | 1.89266500  |
| C | 0.01944200  | -0.42115600 | 0.88262200  |
| H | -0.49699700 | -0.38377900 | 1.84971600  |
| C | 0.44790100  | 1.63732700  | 0.33813900  |
| H | 0.05985900  | 2.23023500  | 1.17730700  |
| C | -0.62113500 | 0.60564000  | -0.09357700 |
| H | -0.43974100 | 0.27739400  | -1.12430600 |
| C | 1.02756800  | 2.55500800  | -0.72291600 |
| H | 1.84476100  | 3.16593500  | -0.32471200 |
| H | 0.26002100  | 3.23488300  | -1.10875300 |
| H | 1.41915100  | 1.97204300  | -1.56313200 |
| C | -2.07591900 | 0.98820700  | 0.08946700  |
| H | -2.26269000 | 1.33026600  | 1.11956900  |
| H | -2.35259200 | 1.83810900  | -0.55248600 |
| C | -3.04404200 | -0.13414900 | -0.18938100 |
| H | -4.11928400 | 0.12635100  | -0.08849900 |
| O | -2.71585400 | -1.25329000 | -0.49698000 |

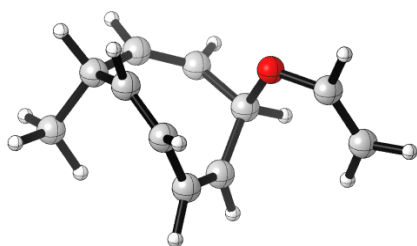

vinyl ether 17

M06-2X/6-311+G(d,p) smd toluene

Energy (0K, vacuum) = -502.625837

Gibbs free energy (393K) = -502.453576

|   |             |             |             |
|---|-------------|-------------|-------------|
| C | 1.52431300  | 1.50811600  | -0.21502400 |
| H | 2.19448300  | 2.36044900  | -0.33299800 |
| C | 0.30637100  | 1.80204300  | 0.24055200  |
| H | 0.09559000  | 2.85198400  | 0.43004100  |
| C | -0.86223700 | 0.87317500  | 0.49368600  |
| H | -1.61856600 | 1.44250900  | 1.05207200  |
| O | -1.43107700 | 0.55582400  | -0.77547300 |
| C | -2.68646700 | 0.05246600  | -0.78346900 |
| H | -3.02220000 | -0.06668900 | -1.80986400 |
| C | -3.46793300 | -0.26414700 | 0.24848900  |
| H | -4.46504900 | -0.63668400 | 0.05143400  |

Electronic Supplementary Information for Chemical Science

|   |             |             |             |
|---|-------------|-------------|-------------|
| H | -3.15587100 | -0.18754900 | 1.28271100  |
| C | -0.52200800 | -0.34665400 | 1.32463300  |
| H | -0.77893200 | -0.27693800 | 2.38030700  |
| C | 0.00771700  | -1.47987300 | 0.85998200  |
| H | 0.10828900  | -2.32446100 | 1.54136400  |
| C | 0.44696100  | -1.67507800 | -0.52840400 |
| H | -0.00159700 | -2.50514600 | -1.07313900 |
| C | 1.34303600  | -0.90994200 | -1.15597900 |
| H | 1.54296900  | -1.13354400 | -2.20209900 |
| C | 2.19759400  | 0.19363100  | -0.56172000 |
| H | 2.92317700  | 0.45162500  | -1.34280600 |
| C | 3.03060500  | -0.28812500 | 0.64415400  |
| H | 3.72372400  | 0.49611700  | 0.96493900  |
| H | 3.61152000  | -1.17441600 | 0.37345300  |
| H | 2.38337300  | -0.53753300 | 1.48696700  |

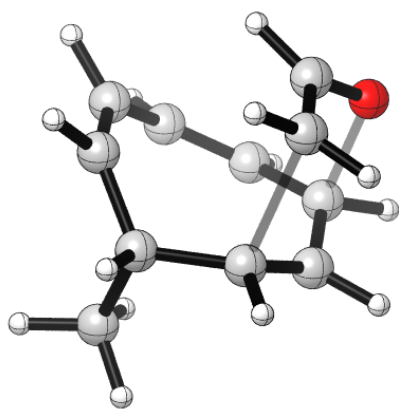

vinyl ether 17 Claisen rearrangement TS

M06-2X/6-311+G(d,p) smd toluene

Energy (0K, vacuum) = -502.572019

Gibbs free energy (393K) = -502.400323

imaginary frequency: -537.48

|   |             |             |             |
|---|-------------|-------------|-------------|
| C | 0.10432900  | -1.40846000 | -0.63085500 |
| H | 0.06231400  | -2.46279900 | -0.90431100 |
| C | -0.63239800 | -0.59922300 | -1.47302600 |
| H | -1.29840800 | -1.13100600 | -2.14900300 |
| C | -1.03667000 | 0.73027500  | -1.21859200 |
| H | -1.77353900 | 1.08692100  | -1.93273300 |
| O | -2.27906900 | 0.42445000  | 0.10486800  |
| C | -1.74831700 | -0.24785800 | 1.06685300  |
| H | -1.33429100 | 0.31136500  | 1.91237800  |
| C | -1.48740100 | -1.60058600 | 0.95545900  |
| H | -1.03001700 | -2.12911200 | 1.78879400  |
| H | -2.06316000 | -2.19588200 | 0.25722900  |
| C | -0.20492000 | 1.86308400  | -0.74735000 |
| H | -0.37449500 | 2.75787700  | -1.34380200 |
| C | 0.66325300  | 2.02577100  | 0.26497300  |
| H | 1.05977600  | 3.03587700  | 0.36464000  |
| C | 1.11075400  | 1.12598100  | 1.32927000  |
| H | 1.24043200  | 1.62151400  | 2.29130200  |
| C | 1.39907900  | -0.17795400 | 1.28567300  |
| H | 1.68960000  | -0.64050000 | 2.22739700  |



*Electronic Supplementary Information for Chemical Science*

|   |            |             |             |
|---|------------|-------------|-------------|
| C | 1.41918700 | -1.09705900 | 0.09285600  |
| H | 1.76796200 | -2.06388100 | 0.47180300  |
| C | 2.44580600 | -0.62484700 | -0.95504700 |
| H | 2.50283000 | -1.33605900 | -1.78460300 |
| H | 3.43716800 | -0.53185800 | -0.50206200 |
| H | 2.15016600 | 0.34719300  | -1.35725100 |

## References

1. F. Del Moro, P. Crotti, V. Di Bussolo, F. Macchia, M. Pineschi, *Org. Lett.* 2003, 5, 1971–1974.
2. M. J. Frisch, G. W. Trucks, H. B. Schlegel, G. E. Scuseria, M. A. Robb, J. R. Cheeseman, G. Scalmani, V. Barone, G. A. Petersson, H. Nakatsuji, X. Li, M. Caricato, A. V. Marenich, J. Bloino, B. G. Janesko, R. Gomperts, B. Mennucci, H. P. Hratchian, J. V. Ortiz, A. F. Izmaylov, J. L. Sonnenberg, D. Williams-Young, F. Ding, F. Lipparini, F. Egidi, J. Goings, B. Peng, A. Petrone, T. Henderson, D. Ranasinghe, V. G. Zakrzewski, J. Gao, N. Rega, G. Zheng, W. Liang, M. Hada, M. Ehara, K. Toyota, R. Fukuda, J. Hasegawa, M. Ishida, T. Nakajima, Y. Honda, O. Kitao, H. Nakai, T. Vreven, K. Throssell, J. A. Montgomery, Jr., J. E. Peralta, F. Ogliaro, M. J. Bearpark, J. J. Heyd, E. N. Brothers, K. N. Kudin, V. N. Staroverov, T. A. Keith, R. Kobayashi, J. Normand, K. Raghavachari, A. P. Rendell, J. C. Burant, S. S. Iyengar, J. Tomasi, M. Cossi, J. M. Millam, M. Klene, C. Adamo, R. Cammi, J. W. Ochterski, R. L. Martin, K. Morokuma, O. Farkas, J. B. Foresman, and D. J. Fox, Gaussian, Inc., Wallingford CT, 2016.
3. Y. Zhao, D. Truhlar, *Theor. Chem. Acc.* 2008, 120, 215.
4. H. P. Hratchian, H. B. Schlegel, *J. Chem. Phys.* 2004, 120, 9918.
5. A. V. Marenich, C. J. Cramer, D. G. Truhlar, *J. Phys. Chem. B* 2009, 113, 6378.
